1 **Cluster-specific gene marker enhance *Shigella* and Enteroinvasive *Escherichia coli* in**  
2 ***silico* serotyping**

3

4 Xiaomei Zhang<sup>1</sup>, Michael Payne<sup>1</sup>, Thanh Nguyen<sup>1</sup>, Sandeep Kaur<sup>1</sup>, Ruiting Lan<sup>1\*</sup>

5

6 <sup>1</sup>School of Biotechnology and Biomolecular Sciences, University of New South Wales, Sydney,  
7 New South Wales, Australia

8

9

10

11 \*Corresponding Author

12 Email: [r.lan@unsw.edu.au](mailto:r.lan@unsw.edu.au)

13 Phone: 61-2-9385 2095

14 Fax: 61-2-9385 1483

15

16 **Keywords:** Phylogenetic clusters, cluster-specific gene markers, *Shigella*/EIEC serotyping

17 **Running title:** *Shigella* EIEC Cluster Enhanced Serotyping

18 Repositories: Raw sequence data are available from NCBI under the BioProject number  
19 PRJNA692536.

20

21

22

23 **Abstract**

24 *Shigella* and enteroinvasive *Escherichia coli* (EIEC) cause human bacillary dysentery with  
25 similar invasion mechanisms and share similar physiological, biochemical and genetic  
26 characteristics. The ability to differentiate *Shigella* and EIEC from each other is important for  
27 clinical diagnostic and epidemiologic investigations. The existing genetic signatures may not  
28 discriminate between *Shigella* and EIEC. Phylogenetically, *Shigella* and EIEC strains  
29 composed of multiple clusters and are different forms of *E. coli*. In this study, we identified 10  
30 *Shigella* clusters, 7 EIEC clusters and 53 sporadic types of EIEC by examining over 17,000  
31 publicly available *Shigella*/EIEC genomes. We compared *Shigella* and EIEC accessory  
32 genomes to identify the cluster-specific gene markers or marker sets for the 17 clusters and 53  
33 sporadic types. The gene markers showed 99.63% accuracy and more than 97.02% specificity.  
34 In addition, we developed a freely available *in silico* serotyping pipeline named *Shigella* EIEC  
35 Cluster Enhanced Serotype Finder (ShigEiFinder) by incorporating the cluster-specific gene  
36 markers and established *Shigella*/EIEC serotype specific O antigen genes and modification  
37 genes into typing. ShigEiFinder can process either paired end Illumina sequencing reads or  
38 assembled genomes. ShigEiFinder provided nearly perfect differentiation of *Shigella* from  
39 EIEC with 99.70% and 99.81% accuracy to assign isolates to the correct clusters for the  
40 assembled genomes and reads mapping respectively. ShigEiFinder was able to serotype over  
41 59 *Shigella* serotypes and 22 EIEC serotypes and provided a high specificity with 99.40% for  
42 assembled genomes and 99.38% for reads mapping for serotyping. The cluster markers and our  
43 new serotyping tool, ShigEiFinder, will be useful for epidemiologic and diagnostic  
44 investigations.

45

46 **Data summary**

47 Sequencing data have been deposited at the National Center for Biotechnology Information  
48 under BioProject number PRJNA692536.

## 49 **Introduction**

50 *Shigella* is one of the most common etiologic agents of foodborne infections worldwide and  
51 can cause diarrhea with a very low infectious dose (1, 2). The infections can vary from mild  
52 diarrhea to severe bloody diarrhea referred to as bacillary dysentery. The estimated cases of  
53 *Shigella* infections are 190 million with at least 210,000 deaths annually, predominantly in  
54 children younger than 5 years old in developing countries (3-7). *Shigella* infections also have a  
55 significantly impact on public health in developed countries although most cases are travel-  
56 associated (8).

57  
58 The *Shigella* genus consists of four species, *Shigella sonnei*, *Shigella flexneri*, *Shigella boydii*  
59 and *Shigella dysenteriae* (9). Serological testing further classifies *Shigella* species into more  
60 than 55 serotypes through the agglutination reaction of antisera to *Shigella* serotype specific O-  
61 antigens (10, 11). Up to 89.6% *Shigella* infections were caused by *S. flexneri* (65.9%) and *S.*  
62 *sonnei* (23.7%) globally (12, 13). The predominant serotype reported in *Shigella* infections has  
63 been *S. flexneri* serotype 2a while *S. dysenteriae* serotype 1 has caused the most severe disease  
64 (11, 14). Note that for brevity, in all references to *Shigella* serotypes below, *S. sonnei*, *S.*  
65 *flexneri*, *S. boydii* and *S. dysenteriae* are abbreviated as SS, SF, SB and SD respectively and a  
66 serotype is designated with abbreviated “species” name plus the serotype number e.g. *S.*  
67 *dysenteriae* serotype 1 is abbreviated as SD1.

68  
69 Enteroinvasive *Escherichia coli* (EIEC) is a pathovar of *E. coli* that causes diarrhoea with less  
70 severe symptoms to *Shigella* infections in humans worldwide, particularly in developing  
71 countries (8, 13, 15-18). EIEC infections in developed countries are mainly imported (19).  
72 EIEC has more than 18 specific *E. coli* O-serotypes (19, 20). Although the incidence of EIEC  
73 is low (17), EIEC serotypes have been associated with outbreaks and sporadic cases of  
74 infections (20-22). In contrast to *Shigella*, EIEC infections are not notifiable in many countries  
75 (23, 24).

76  
77 *Shigella* and EIEC have always been considered very closely related and share several  
78 characteristics (25-28). *Shigella* and EIEC are both non-motile and lack the ability of ferment  
79 lactose (24). Some of EIEC O antigens are identical or similar to *Shigella* O antigens (O112ac,  
80 O124, O136, O143, O152 and O164) (26, 29-31). Furthermore, *Shigella* and EIEC both carry  
81 the virulence plasmid pINV, which encodes virulence genes required for invasion (32, 33) and  
82 contains *ipaH* (invasion plasmid antigen H) genes with the exception of some SB13 isolates

83 (10, 23, 24, 34, 35). *Shigella* and EIEC have arisen from *E. coli* in multiple independent  
84 events and should be regarded as a single pathovar of *E. coli* (25, 26, 28, 36-38). Previous  
85 phylogenetic studies suggested that *Shigella* isolates were divided into 3 clusters (C1, C2 and  
86 C3) with 5 outliers (SS, SB13, SD1, SD8 and SD10) (25, 38) whereas EIEC isolates were  
87 grouped into four clusters (C4, C5, C6 and C7) (26). The seven *Shigella*/EIEC clusters and 5  
88 outliers of *Shigella* are within the broader non-enteroinvasive *E. coli* species except for SB13  
89 which is closer to *Escherichia albertii* (39, 40). Alternative WGS-based phylogenomic studies  
90 have also defined multiple clusters of *Shigella* and EIEC (23, 28, 41).

91  
92 The traditional biochemical test for motility and lysine decarboxylase (LDC) activity (42) and  
93 molecular test for the presence of *ipaH* gene have been used to differentiate *Shigella* and EIEC  
94 from non-enteroinvasive *E. coli* (24, 43-45). Agglutination with *Shigella*/EIEC associated  
95 antiserum further classify *Shigella* or EIEC to serotype level. However, cross-reactivity, strains  
96 not producing O antigens, and newly emerged *Shigella* serotypes may all prevent accurate  
97 serotyping (10, 46). Serotyping by antigenic agglutination is being replaced by molecular  
98 serotyping (47, 48), which can be achieved through examination of the sequences of O antigen  
99 biosynthesis and modification genes (8, 24, 49-52).

100  
101 Recently, PCR-based molecular detection methods targeting the gene *lacY* were developed to  
102 distinguish *Shigella* from EIEC (53, 54). However, the ability of the primers described in these  
103 methods to accurately differentiate between *Shigella* and EIEC was later questioned (23, 28).  
104 With the uptake of whole-genome sequencing technology, several studies have identified  
105 phylogenetic clade specific markers, species specific markers and EIEC lineage-specific genes  
106 for discrimination between *Shigella* and EIEC and between *Shigella* species (23, 27, 28, 41, 55,  
107 56). More recently, genetic markers *lacY*, *cadA*, *Ss\_methylase* were used for identification of  
108 *Shigella* and EIEC (10). However, these markers failed to discriminate between *Shigella* and  
109 EIEC when a larger genetic diversity is considered (23, 28, 55). A Kmer-based approach can  
110 identify *Shigella* isolates to the species level but misidentification was also observed (56).

111  
112 In this study, we aimed to i), identify phylogenetical clusters of *Shigella* and EIEC through  
113 large scale examination of publicly available genomes; ii), identify cluster-specific gene  
114 markers using comparative genomic analysis of *Shigella* and EIEC accessory genomes for  
115 differentiation of *Shigella* and EIEC; iii), develop a pipeline for *Shigella* and EIEC *in silico*  
116 serotyping based on the cluster-specific gene markers combined with *Shigella* and EIEC

117 serotype-specific O antigen and H antigen genes. We demonstrate that these cluster-specific  
118 gene markers enhance *in silico* serotyping using genomic data. We also developed an  
119 automated pipeline for cluster typing and serotyping of *Shigella*/EIEC from WGS data.

120

## 121 **Materials and Methods**

### 122 **Identification of *Shigella*/EIEC isolates from NCBI database**

123 *E. coli*/*Shigella* isolates from the NCBI SRA (National Center for Biotechnology Information  
124 Sequence Read Archive ) as May of 2019 were queried. Raw reads were retrieved from ENA  
125 (European Nucleotide Archive). The *ipaH* gene (GenBank accession number M32063.1) was  
126 used to screen *E. coli*/*Shigella* reads using Salmon v0.13.0 (57). Taxonomic classification for  
127 *E. coli*/*Shigella* was confirmed by Kraken v1.1.1 (58). Molecular serotype prediction of *ipaH*  
128 negative *Shigella* isolates was performed by ShigaTyper v1.0.6 (10). Isolates that were *ipaH*  
129 positive and isolates with designation of SB13 by ShigaTyper were selected as *Shigella*/EIEC  
130 database.

131

132 The sequence types (STs) and ribosomal STs (rSTs) of *ipaH* gene negative *E. coli* (non-  
133 enteroinvasive *E. coli*) isolates were examined. STs and rSTs for these isolates were obtained  
134 from the *E. coli*/*Shigella* database in the Enterobase (59) as of May 2019. For STs and rSTs  
135 with only one isolate, the isolates were selected. For STs and rSTs with more than one isolates,  
136 one representative isolate for each ST and rST were randomly selected. In total, 12,743 *ipaH*  
137 negative *E. coli* isolates representing 3,800 STs and 11,463 rSTs were selected as non-  
138 enteroinvasive *E. coli* control database.

139

### 140 **Genome sequencing**

141 Whole-genome sequencing (WGS) of 31 EIEC strains used in a previous study (26) was  
142 performed by Illumina NextSeq (Illumina, Scoresby, VIC, Australia). DNA libraries were  
143 constructed using Nextera XT Sample preparation kit (Illumina Inc., San Diego, CA, USA) and  
144 sequenced using the NextSeq sequencer (Illumina Inc.). FASTQ sequences of the strains  
145 sequenced in this study were deposited in the NCBI under the BioProject (PRJNA692536).

146

147

### 148 **Genome assembly and data processing**

149 Raw reads were *de novo* assembled using SPADES v3.14.0 assembler with default settings  
150 [<http://bioinf.spbau.ru/spades>] (60). The metrics of assembled genomes were obtained with

151 QUAST v5.0.0 (61). Three standard deviations (SD) from the mean for contig number, largest  
152 contig, total length, GC, N50 and genes were used as quality filter for assembled genomes.

153  
154 The STs for isolates in *Shigella*/EIEC database was checked by using mlst  
155 (<https://github.com/tseemann/mlst>) with the *E. coli* scheme from PubMLST (62). rSTs were  
156 extracted from the *E. coli/Shigella* rMLST database in Enterobase (59) as of May 2019.

157 Serotype prediction for isolates in *Shigella*/EIEC was performed by ShigaTyper v1.0.6 (10).  
158 Serotyping of *E. coli* O and H antigens were predicted by using SerotypeFinder v2.0.1 (63).

159

### 160 **Selection of isolates for *Shigella*/EIEC identification dataset**

161 The selection of isolates for the identification dataset was based on the representative isolates  
162 for each ST, rST and serotype of *Shigella* and EIEC in the *Shigella*/EIEC database. For STs  
163 and rSTs with only one isolate, the isolate was selected. For STs and rSTs with more than one  
164 isolates, one representative isolate for each ST, rST was randomly selected. A representative  
165 experimentally confirmed isolate of each serotype of *Shigella* and EIEC was also randomly  
166 selected. 72 ECOR strains downloaded from Enterobase (59) and 18 *E. albertii* strains were  
167 used as controls for the identification dataset. The details of the identification dataset are listed  
168 in Table S1. The remaining isolates in *Shigella*/EIEC database were referred as validation  
169 dataset (Table S2).

170

171 The identification dataset was used for identification of phylogenetic relationships of *Shigella*  
172 and EIEC. The identification dataset was also used for identification of cluster-specific genes.  
173 The validation dataset was used to evaluate the performance of cluster-specific gene markers  
174 using the *in-silico* serotyping pipeline.

175

### 176 **Phylogeny of *Shigella* and EIEC based on WGS**

177 Three phylogenetic trees including identification tree, confirmation tree and validation tree  
178 were constructed by Quicktree v1.3 (64) with default parameters to identify and confirm the  
179 phylogenetic clustering of *Shigella* and EIEC isolates. The phylogenetic trees were visualised  
180 by Grapetree's interactive mode and ITOL v5 (65, 66).

181

182 The identification phylogenetic tree was generated based on isolates in the identification  
183 dataset for identification of clusters of *Shigella* and EIEC isolates (Fig. 1). A subset of 485  
184 isolates known to represent each identified cluster from the identification dataset were then

185 selected. The subset of 485 isolates from the identification dataset and 1,872 non-  
186 enteroinvasive *E. coli* isolates from non-enteroinvasive *E. coli* control dataset (2,357 isolates  
187 total) were used to construct a confirmation tree. This tree was used for confirmation of the  
188 phylogenetic relationships between identified *Shigella*/EIEC clusters in the identification  
189 dataset and non-enteroinvasive *E. coli* isolates. The validation tree was generated based on  
190 1,159 representative isolates from the validation dataset that were selected in the same way as  
191 the identification dataset and a subset of 485 isolates from the identification dataset to assign  
192 validation dataset isolates to clusters.

193

#### 194 **Investigation of *Shigella* virulence plasmid pINV**

195 The presence of *Shigella* virulence plasmid pINV in isolates were investigated by using [BWA-](#)  
196 [MEM v0.7.17 \(Burrows-Wheeler Aligner\)](#) (67) to align isolate raw reads onto the reference  
197 sequence of pINV (68) (NC\_024996.1). Mapped reads were sorted and indexed using  
198 Samtools v1.9 (69). The individual gene coverage from mapping was obtained using Bedtools  
199 coverage v2.27.1 (70).

200

#### 201 **Identification of the cluster-specific gene markers**

202 Cluster-specific gene markers were identified from *Shigella*/EIEC accessory genomes. The  
203 genomes from the identification dataset were annotated using PROKKA v1.13.3 (71). Pan- and  
204 core-genomes were analysed by roary v3.12.0 (72) using an 80% sequence identity threshold.  
205 The genes specific to each cluster were identified from the accessory genes with an in-house  
206 python script. In this study, the number of genomes from a given cluster containing all specific  
207 genes for that cluster was termed true positives (TP), the number of genomes from the same  
208 cluster lacking any of those same genes was termed false negatives (FN). The number of  
209 genomes from other clusters containing all of those same genes was termed false positives  
210 (FP).

211

212 The sensitivity (True positive rate, TPR) of each cluster-specific gene marker was defined as  
213  $TP/(TP+FN)$ . The specificity (True negative rate, TNR) was defined as  $TN/(TN+FP)$ .

214

#### 215 **Validation of the cluster-specific gene markers**

216 The ability of cluster-specific gene markers to assign *Shigella*/EIEC isolates was examined by  
217 using BLASTN to search against the validation dataset (Table S2) and non-enteroinvasive *E.*  
218 *coli* control database for the presence of any of the cluster-specific gene marker or a set of

219 cluster-specific gene markers. The BLASTN thresholds were defined as 80% sequence identity  
220 and 50% gene length coverage.

221

## 222 **Development an automated pipeline for molecular serotyping of *Shigella*/EIEC**

223 The pipeline was developed using paired end illumina genome sequencing reads or assembled  
224 genomes identify cluster-specific gene markers combined with *Shigella*/EIEC serotype specific  
225 O antigen genes (*wzx* and *wzy*) and modification genes (Fig. 2, Data S1). We used the same  
226 signature O and H sequences from ShigaTyper and SerotypeFinder (Data S2) (10, 63). These  
227 includes *Shigella* serotype-specific *wzx/wzy* genes and modification genes from ShigaTyper  
228 and *E. coli* O antigen and *fliC* (H antigen) genes from SerotypeFinder. *ipaH* gene and 38  
229 virulence genes used in analysis of virulence of 59 sporadic EIEC isolates were also included  
230 in the typing reference sequences database. Seven House Keeping (HK) genes *-recA, purA,*  
231 *mdh, icd, gyrB, fumC* and *adk* downloaded from NCBI were used for contamination checking.

232

233 Raw reads were aligned to the typing reference sequences by using BWA-MEM v0.7.17 (67).  
234 The mapping length percentage and the mean mapping depth for all genes were calculated  
235 using Samtools coverage v1.10 (69). To determine whether the genes present or absent, 50% of  
236 mapping length for all cluster-specific genes, virulence genes and O antigen genes and 10% for  
237 *ipaH* gene were used as cutoff value. The ratio of mean mapping depth to the mean mapping  
238 depth of the 7 HK genes was used to determine a contamination threshold with ratios less than  
239 1% for *ipaH* gene and less than 10% for other genes assigned as contamination. Reads  
240 coverage mapped to particular regions of genes were checked by using samtools mpileup  
241 v1.10.

242

243 Assembled genomes were BLASTN v2.9.0 (73) searched against the typing reference  
244 sequences with 80% sequence identity and 50% gene length coverage for all genes with  
245 exception of *ipaH* gene which was defined as 10% gene length coverage.

246

247 The pipeline was tested with the identification dataset and validated with the *Shigella*/EIEC  
248 validation dataset and non-enteroinvasive *E. coli* control database. The specificity defined as (1  
249 - the number of non-enteroinvasive *E. coli* isolates being detected / the total number of non-  
250 enteroinvasive *E. coli* isolates) \* 100.

251

252



## 253 **Results**

### 254 **Screening sequenced genomes for *Shigella*/EIEC isolates**

255 We first screened available *E. coli* and *Shigella* genomes based on the presence of *ipaH* gene.

256 We examined 122,361 isolates with the species annotation of *E. coli* (104,256) or *Shigella*  
257 (18,105) with paired end illumina sequencing reads available in NCBI SRA database. Of  
258 122,361 isolates, 17,989 isolates were positive to the *ipaH* gene including 455 out of 104,256  
259 *E. coli* isolates and 17,434 out of 18,105 *Shigella* isolates. The 17,989 *ipaH* positive *E. coli* and  
260 *Shigella* genomes and 571 *ipaH* negative “*Shigella*” genomes were checked for taxonomic  
261 classification and genome assembly quality. 17,320 *ipaH* positive *E. coli* and *Shigella* genomes  
262 and 246 *ipaH* negative “*Shigella*” genomes passed quality filters. Among 246 *ipaH* negative  
263 “*Shigella*” genomes, 11 isolates belonged to SB13 by using ShigaTyper (10) while the  
264 remaining 235 isolates were classified with taxonomic identifier of *E. coli* by Kraken v1.1.1  
265 (58) and were removed from analysis. A total of 17,331 genomes including 17,320 *ipaH*  
266 positives and 11 SB13 genomes were selected to form the *Shigella*/EIEC database, which  
267 contained 429 genomes with species identifier of *E. coli* and 16,902 genomes with species  
268 identifier of *Shigella*.

269  
270 Isolates in *Shigella*/EIEC database were typed using MLST, ShigaTyper and serotypeFinder.  
271 MLST and rMLST divided the 17,331 *Shigella*/EIEC isolates into 252 STs (73 isolates  
272 untypeable by MLST ) and 1,128 rSTs (3,513 isolates untypeable by rMLST). Of 16,902  
273 genomes with species identifier of *Shigella*, 8,313 isolates and 8,189 isolates were typed as  
274 *Shigella* and EIEC respectively by ShigaTyper while 400 isolates were untypeable. ShigaTyper  
275 typed the majority of the 8,313 isolates as SF (66.82%) including 25.43% SF2a isolates,  
276 followed by SS (19.69%), SB (7.22%) and SD (6.27%).

277  
278 SerotypeFinder typed 293 of the 429 *E. coli* genomes into 71 *E. coli* O/H antigen types.  
279 Among these 293 isolates with typable O/H antigen types, 190 isolates belonged to 22 known  
280 EIEC serotypes (O28ac:H-, O28ac:H7, O29:H4, O112ac:H26, O121:H30, O124:H30,  
281 O124:H24, O124:H7, O132:H7, O132:H21, O135:H30, O136:H7, O143:H26, O144:H25,  
282 O152:H-, O152:H30, O164:H-, O164:H30, O167:H26, O173:H7 and 2 newly emerged EIEC  
283 serotypes O96:H19 and O8:H19) (20-22). The remaining 136 of 429 genomes were O antigen  
284 untypable and typed to 15 H antigen types only by SerotypeFinder, of which H16 was the  
285 predominant H antigen type.

286

## 287 **Identification of *Shigella* and EIEC clusters**

288 *Shigella* and EIEC are known to have been derived from *E. coli* independently. To identify  
289 previously defined clusters (25, 26) and any new clusters from the 17,331 *Shigella*/EIEC  
290 genomes, we selected representative genomes to perform phylogenetic analysis as it was  
291 impractical to construct a tree with all genomes. The selection was based on ST, rST and  
292 serotype of the 17,331 *Shigella*/EIEC genomes. One isolate was selected to represent each ST,  
293 rST and serotype for a total of 1,830 isolates. The selection included 252 STs, 1,128 rSTs, 59  
294 *Shigella* serotypes (21 SB serotypes, 20 SF serotypes, 17 SD serotypes and SS), 22 EIEC  
295 known serotypes and 31 other or partial antigen types. A further 31 in-house sequenced EIEC  
296 isolates, 18 EIEC isolates used in a previous typing study (41), 72 ECOR strains and 18 *E.*  
297 *albertii* strains were also included to form the identification dataset of 1,969 isolates. Details  
298 are listed in Table S1. A phylogenetic tree was constructed based on the identification dataset  
299 to identify the clusters (Fig. 1).

300  
301 All known clusters were identified (Fig. 1) including 3 *Shigella* clusters (C1, C2, C3) and 5  
302 outliers (SD1, SD8, SD10, SB13 and SS) as defined by Pupo et al (25) and 4 EIEC clusters  
303 (C4, C5, C6 and C7) defined by Lan et al. (26). Each of these clusters was supported by a  
304 bootstrap value of 80% or greater (Fig. S1). 1,789 isolates of the 1,879 *Shigella*/EIEC isolates  
305 (1,830 isolates from the *Shigella*/EIEC database, 31 in-house sequenced EIEC isolates and 18  
306 EIEC isolates from Hazen *et al.*) fell within these clusters.

307  
308 Of the remaining 90 *Shigella*/EIEC unclustered isolates, 31 belonged to 5 *Shigella*/EIEC  
309 serotypes including 5 SB13 isolates, 8 SB12 isolates, 2 EIEC O135:H30 isolates, 12 EIEC  
310 serotype O96:H19 isolates and 4 EIEC O8:H19 isolates, while 59 isolates were sporadic EIEC  
311 isolates which are described in detail in the separate section below. The 5 SB13 isolates were  
312 grouped into one lineage within *E. coli* and close to known *Shigella*/EIEC clusters rather than  
313 the established SB13 cluster outside *E. coli* which was within the *E. albertii* lineage. The  
314 former was previously named as atypical SB13 while the latter was previously named as  
315 typical SB13 (39). The 8 SB12 isolates formed one single cluster close to SD1 and atypical  
316 SB13 clusters. Two EIEC O135:H30 isolates were grouped as a separate cluster close to C5.  
317 Twelve isolates belonging to EIEC serotype O96:H19 and 4 isolates typed as O8:H19 were  
318 clustered into two separate clusters, both of which were more closely related to SD8 than other  
319 *Shigella*/EIEC clusters. Therefore, atypical SB13 and SB12 were defined as new clusters of

320 *Shigella* while EIEC O96:H19, EIEC O8:H19 and EIEC O135:H30 were defined as C8, C9  
321 and C10 respectively. In total there were 10 *Shigella* clusters and 7 EIEC clusters (Table 1).

322

### 323 **Analysis of the 59 sporadic EIEC isolates**

324 To determine the phylogenetic relationships of the above defined clusters and the remaining 59  
325 sporadic EIEC isolates within the larger non-enteroinvasive *E. coli* population a confirmation  
326 tree was generated using 485 isolates representing the known clusters and 1,872 representative  
327 non-*Shigella*/EIEC isolates (Fig. S2). The 59 sporadic EIEC isolates including 2 EIEC isolates  
328 M2330 (O152:H51) and M2339 (O124:H7) sequenced in this study and 57 isolates were  
329 interspersed among non-*Shigella*/EIEC isolates and did not form large clusters. Groups of these  
330 isolates that were not previously identified were named as sporadic EIEC lineage followed by  
331 their serotype. For example, M2339 (O124:H7) grouped together with one other EIEC isolate  
332 with the same O and H antigens O124:H7 and were named ‘sporadic EIEC lineage O124:H7’.  
333 There were 53 sporadic EIEC lineages including 5 lineages with 2 or more isolates and 48  
334 lineages with only one isolate. The STs, rSTs and antigen types of these 59 isolates were listed  
335 in the Table S1.

336

337 Some of the sporadic EIEC isolates fell into STs containing *ipaH* negative isolates. We  
338 therefore examined the presence of the pINV virulence plasmid in the sporadic EIEC isolates.  
339 We selected 38 genes that are essential for virulence including 35 genes (12 *mxi* genes, 9 *spa*  
340 genes, 5 *ipaA-J* genes, 6 *ipgA-F* genes as well as *acp*, *virB*, *icsB*) in the conserved entry region  
341 encoding the Mxi-Spa-Ipa type III secretion system and its effectors and 3 regulator genes  
342 (*virF*, *virA* and *icsA/virG*) (24, 33, 68) and determined the presence of pINV in the 59 sporadic  
343 EIEC isolates by mapping the sequence reads onto a pINV reference sequence (68). Reads  
344 from 18 non-*Shigella*/EIEC isolates that shared the same ST as one of 58 sporadic isolates  
345 were positive for these genes.

346

347 The number of essential virulence genes with mapped reads in the 59 sporadic EIEC isolates  
348 were analysed (Fig. S3). Those isolates containing more than 25 of the 38 essential virulence  
349 genes were defined as virulence plasmid positive. While isolates containing between 13 and 25  
350 were defined as intermediate and less than 13 were defined as virulence plasmid negative.

351

352 The 2 newly sequenced sporadic EIEC isolates (M2330 and M2339) were positive for the  
353 virulence plasmid and of the other 57 sporadic EIEC isolates, 39 isolates were positive, 9

354 isolates were negative and 9 isolates were intermediate (Table S1). The results were compared  
355 with those non-*Shigella*/EIEC isolates belonging to the same ST. The virulence plasmid was  
356 absent in all non-*Shigella*/EIEC isolates while all sporadic EIEC isolates in these STs were  
357 either positive or intermediate. Therefore, this analysis confirmed the sporadic isolates  
358 belonged to EIEC and the STs contained both EIEC and non- EIEC isolates.

359

### 360 **Identification of cluster-specific gene markers**

361 In this study, cluster-specific gene markers were either a single gene present in all isolates of a  
362 cluster and absent in all other isolates or a set of genes (two or more) that as a combination  
363 were only found in one cluster. For the marker sets, a subset of cluster-specific gene markers  
364 for a given cluster could be found in other clusters but the entire set was only found in the  
365 target cluster.

366

367 Comparative genomic analysis on 1,969 accessory genomes from the identification dataset was  
368 used to identify cluster-specific gene markers or marker sets. Multiple candidate cluster-  
369 specific gene markers or marker sets of markers for each of 17 *Shigella*/EIEC clusters and 53  
370 sporadic EIEC lineages were identified through screening the accessory genes from 1,969  
371 genomes . These gene markers or marker sets were 100% sensitive to clusters but with varying  
372 specificity. The cluster-specific gene markers or marker sets of markers with the lowest FP  
373 rates were then selected from candidate cluster-specific gene markers by BLASTN searches  
374 against genomes in the identification dataset using 80% sequence identity and 50% gene length  
375 coverage threshold.

376

377 Five single cluster-specific gene markers (C7, C10, SB12, SB13 and atypical SB13) and 12  
378 sets of cluster-specific gene markers (C1, C2, C3, C4, C5, C6, C8, C9, SS, SD1, SD8 and  
379 SD10) were selected for *Shigella*/EIEC cluster typing. The sensitivity and specificity for each  
380 cluster-specific gene marker or a set of cluster-specific gene markers for the identification  
381 dataset were listed in Table 2. The cluster-specific gene markers or marker sets of markers  
382 were all 100% sensitive and 100% specific with exception of C1 (99.94%), C3 (99.91%  
383 specificity) and SS (99.8% specificity). A single specific gene for each of 53 sporadic EIEC  
384 lineages were also selected with the exception of one lineage which has a set of 2 genes. These  
385 genes were all 100% sensitive and specific for a given sporadic EIEC lineage.

386

387 All cluster-specific gene markers, 37 in total (5 single, 32 genes in 12 sets) and 54 sporadic  
388 EIEC lineages specific gene markers were located on chromosome but one of C4 gene markers  
389 and 5 sporadic EIEC lineages specific genes were located on plasmid. None of the cluster-  
390 specific gene markers were contiguous in the genomes. The location of these cluster-specific  
391 gene markers was determined by BLASTN against representative complete genomes of  
392 *Shigella*/EIEC containing gene features downloaded from NCBI GenBank. In those cluster or  
393 sporadic lineages with no representative complete genome specific gene markers were named  
394 using their cluster or sporadic EIEC lineage followed by the cluster or lineage number. For  
395 example, C7 specific gene marker was named “C7 specific gene”.

396  
397 The functional characterization of these specific gene markers were identified from RAST  
398 annotation (74). For 37 cluster-specific gene markers, 22 had known functions and 15 encoded  
399 hypothetical proteins with unknown functions, while 11 sporadic EIEC lineages specific gene  
400 markers were identified with known functions and 43 were hypothetical proteins with  
401 unknown functions. The location and functions of specific gene markers are listed in Table S3.

402

#### 403 **Validation of cluster-specific gene markers**

404 The ability of cluster-specific gene markers to correctly assign *Shigella*/EIEC isolates was  
405 evaluate with 15,501 *Shigella*/EIEC isolates in the validation dataset, 12,743 isolates from non-  
406 enteroinvasive *E. coli* control database.

407

408 Using cluster-specific gene markers, 15,443 of the 15,501 (99.63%) *Shigella*/EIEC isolates  
409 were correctly assigned to clusters which included 15,337 *Shigella* isolates, 102 EIEC isolates,  
410 4 sporadic EIEC isolates, and 38 (0.24%) isolates with more than one clusters. Twenty of the  
411 15,501 (0.13%) *Shigella*/EIEC isolates were not assigned to any of identified clusters.

412

413 To confirm the assignment of cluster-specific gene markers, we constructed a “validation”  
414 phylogenetic tree (Fig. S4) using 1,159 representative isolates from the validation dataset and a  
415 subset of 485 isolates from each cluster from the identification dataset. Isolates that grouped  
416 with known cluster isolates (from identification dataset) with strong bootstrap support were  
417 assigned to that cluster. All 1,159 isolates were grouped into known clusters on the validation  
418 phylogenetic tree. The cluster-specific gene markers assignments were entirely consistent with  
419 cluster assignments by phylogenetic tree.

420

421 We tested cluster-specific gene markers with the 12,743 non-enteroinvasive *E. coli* isolates.  
422 The *Shigella*/EIEC cluster-specific gene markers were highly specific with specificity varying  
423 from 98.8% to 100% for cluster-specific genes and 97.02% to 100% for sporadic EIEC specific  
424 genes. Details are listed in Table S4.

425

#### 426 **Development an automated pipeline for molecular serotyping of *Shigella*/EIEC**

427 Above results showed that cluster-specific gene markers were sensitive and specific and can  
428 distinguish *Shigella* and EIEC isolates. We therefore used these genes combined with  
429 established *Shigella*/EIEC serotype specific O antigen and H antigen genes to develop an  
430 automated pipeline for *in silico* serotyping of *Shigella*/EIEC (Fig. 2).

431

432 The pipeline is named *Shigella* EIEC Cluster Enhanced Serotype Finder (ShigEiFinder).  
433 ShigEiFinder can process either paired end Illumina sequencing reads or assembled genomes  
434 (<https://github.com/LanLab/ShigEiFinder>). ShigEiFinder classifies isolates into Non-  
435 *Shigella*/EIEC, *Shigella* or EIEC clusters based on the presence of *ipaH* gene, number of  
436 virulence genes, cluster specific genes. The “Not *Shigella*/EIEC” assignment was determined  
437 by the absence of *ipaH* gene, virulence genes (>25/38) and cluster-specific gene markers. The  
438 “*Shigella* or EIEC clusters” assignments were made based on the presence of *ipaH* gene,  
439 and/or more than 25 virulence genes together with the presence of any of cluster-specific gene  
440 markers or marker set, whereas the presence of *ipaH* gene and/or more than 25 virulence genes  
441 with absence of any of cluster-specific gene markers were assigned as “*Shigella*/EIEC  
442 unclustered”.

443

444 *Shigella* and EIEC isolates were differentiated and serotypes were assigned after cluster  
445 assignment. ShigEiFinder predicts a serotype through examining the presence of any of  
446 established *Shigella* serotype specific O antigen and modification genes and *E. coli* O and H  
447 antigen genes that differentiate the serotypes as ShigaTyper and SerotypeFinder (10, 63). A  
448 “novel serotype” is assigned if no match to known serotypes.

449

450 Two pairs of *Shigella* serotypes, SB1/SB20 and SB6/SB10, are known to be difficult to  
451 differentiate as they share identical O antigen genes (10, 46, 75). ShigaTyper used a heparinase  
452 gene for the differentiation of SB20 from SB1 and *wbaM* gene for the separation of SB6 from  
453 SB10. We found that fragments of the heparinase and *wbaM* genes may be present in other  
454 serotypes and cannot accurately differentiate SB1/SB20 and SB6/SB10. We found a SB20

455 specific gene which encoded hypothetical proteins with unknown functions and located on a  
456 plasmid by comparative genomic analysis of all isolates in C1 accessory genome. The SB20  
457 specific gene can reliably differentiate SB20 from SB1 and also one SNP each in *wzx* and *wzy*  
458 genes that can differentiate SB6 from SB10. We used these differences (Data S1) in  
459 ShigEiFinder for the prediction of these serotypes.

460

#### 461 **The accuracy and specificity of ShigEiFinder in cluster typing**

462 The accuracy of ShigEiFinder was tested with 1,969 isolates (1,969 assembled genomes and  
463 1,951 Illumina reads [note no reads available for 18 EIEC isolates from NCBI] from the  
464 identification dataset and 15,501 isolates from the validation dataset. The results are listed in  
465 Table 3.

466

467 ShigEiFinder was able to assign 99.54% and 99.28% of the isolates in the identification dataset  
468 to clusters for assembled genomes and reads mapping respectively. The accuracy was 99.70%  
469 and 99.81% for assembled genomes and reads mapping respectively when applied to the  
470 validation dataset. Discrepancies were observed between assembled genomes and reads  
471 mapping (Table 3). There were more isolates assigned to “*Shigella*/EIEC unclustered” in reads  
472 mapping, in contrast there were more isolates assigned to multiple clusters in genome  
473 assemblies. The specificity of ShigEiFinder was 99.40% for assembled genomes and 99.38%  
474 for reads mapping when evaluated with 12,743 non-*Shigella*/EIEC *E. coli* isolates. An  
475 additional 2 isolates were detected as sporadic EIEC lineages by reads mapping.

476

#### 477 **Comparison of ShigEiFinder and ShigaTyper**

478 To demonstrate ShigEiFinder for differentiation of *Shigella* from EIEC and enhancement of  
479 cluster based serotyping, the comparison of reads mapping results between ShigEiFinder and  
480 the existing *in silico* *Shigella* identification pipeline ShigaTyper (10) was performed with 488  
481 isolates used in ShigaTyper and 15,501 isolates from *Shigella*/EIEC validation dataset used in  
482 the present study.

483

484 The 488 isolates used in ShigaTyper consisted of 23 other species, 45 *E. coli* isolates and 420  
485 *Shigella* isolates. ShigEiFinder identified 23 other species isolates and 453 out of 465 *E. coli*  
486 and *Shigella* isolates correctly, in agreement with ShigaTyper assignment. ShigEiFinder also  
487 assigned the remaining 12 *E. coli* and *Shigella* isolates including 3 EIEC isolates and 9

488 untypable (either multiple *wzx* or no *wzx* genes found) isolates by ShigaTyper to *Shigella*/EIEC  
489 clusters.

490  
491 ShigEiFinder assigned 15,471 of 15,501 *Shigella*/EIEC isolates to *Shigella* or EIEC clusters  
492 and then to a serotype. The accuracy of ShigEiFinder to correctly assign isolates to *Shigella* or  
493 EIEC clusters was 99.81% (15,471/15,501). By contrast, ShigaTyper assigned 7,277 isolates  
494 (46.95%) to *Shigella*, 7,976 isolates (51.45%) to EIEC, 177 (1.14%) isolates to multiple *wzx*  
495 genes and failed to type 71 (0.46%) isolates.

496  
497 The predicted serotype of 7,277 (46.96%) *Shigella* isolates by ShigaTyper agreed with the  
498 results of ShigEiFinder. For 8,224 isolates typed as EIEC or untypable by ShigaTyper, 99.73%  
499 (8,202/8,224) of the isolates were assigned to *Shigella* or EIEC clusters by ShigEiFinder (Table  
500 4). Of these isolates, the majority belonged to SS, SD1 and SF which were erroneously  
501 predicted as EIEC by ShigaTyper.

502  
503 **Discussion**  
504 *Shigella* and EIEC cause human bacillary dysentery with similar invasion mechanisms,  
505 however the pathogenicity of these 2 groups varies (8, 43). The prevalence of each of the four  
506 *Shigella* “species” also varies (11-13). Differentiation of *Shigella* and EIEC from each other is  
507 important for epidemiologic and diagnostic investigations. However, their similar  
508 physiological, biochemical and genetic characteristics make this differentiation difficult.

509  
510 **Determining phylogenetic clusters for better separation *Shigella* isolates from EIEC**  
511 From phylogenetic perspective, *Shigella* and EIEC strains consisted of multiple phylogenetic  
512 lineages derived from commensal *E. coli*, which do not reflect the nomenclature of *Shigella*  
513 and EIEC (23, 25, 26, 28, 38, 41). In the present study, we identified all phylogenetic clusters  
514 of *Shigella* and EIEC through large scale examination of publicly available genomes.  
515 Phylogenetic results demonstrated that *Shigella* isolates had at least 10 clusters while EIEC  
516 isolates had at least 7 clusters. The 10 *Shigella* clusters included the 7 previously defined  
517 lineages including 3 major clusters (C1, C2 and C3) and 5 outliers (SD1, SD8, SD10, SB13  
518 and SS) (25) and 2 newly identified clusters (SB12 and SB13-atypical). The 7 EIEC clusters  
519 consisted of 4 previously defined EIEC clusters (C4, C5, C6 and C7) (26) and 3 newly  
520 identified EIEC clusters (C8 EIEC O96:H19, C9 EIEC O8:H19 and C10 EIEC O135:H30).

521



522 Our WGS-based phylogeny provided high resolution for assigning *Shigella* and EIEC isolates  
523 to clusters. Several serotypes that are currently increasing in frequency (SB19, SB20, SD14,  
524 SD15, SD provisional serotype 96-626) (76-79) were assigned to clusters and five new  
525 clusters/outliers were identified. SB13 isolates in this study formed two known lineages. One  
526 lineage was located outside of *Shigella*/EIEC clusters and represented the outlier SB13 which  
527 is in fact belonging to the newly defined species *E. albertii* (25, 26, 38, 39). The second lineage  
528 was with *E. coli*, and was defined as atypical SB13 previously (39). The newly identified  
529 *Shigella* outlier SB12 was previously grouped into C3 based on housekeeping gene trees (25,  
530 38) but was seen as outliers in two other studies (28, 56).

531  
532 Newly identified clusters C8 (EIEC O96:H19) and C9 (EIEC O8:H19) represented the  
533 emergence of novel EIEC serotypes. A recent study revealed that EIEC serotype O96:H19 (C8)  
534 could be the result of a recent acquisition of the invasion plasmid by commensal *E. coli* (80).  
535 The EIEC serotype O8:H19 (C9) had not been reported previously.

536  
537 Apart from the 17 major and outlier clusters of *Shigella* and EIEC, the presence of 53 sporadic  
538 EIEC lineages indicated greater genetic diversity than has been observed previously. Isolates  
539 belonging to these sporadic EIEC groups were more closely related to non-enteroinvasive *E.*  
540 *coli* isolates than to major *Shigella*/EIEC lineages. However, 41 of the isolates representing 38  
541 sporadic EIEC lineages that carried pINV. *Shigella* and EIEC both carry the *Shigella* virulence  
542 plasmid pINV which is vital for virulence and distinguishes *Shigella*/EIEC from other *E. coli*  
543 (24, 33, 68). Therefore, these isolates may represent recently formed EIEC lineages through  
544 acquisition of the pINV. The remaining 18 isolates contained the *ipaH* gene but may or may  
545 not carry pINV. It is possible that these strains carried very low copy number of pINV or the  
546 pINV plasmid was lost during culture.

547  
548 **Highly sensitive and specific cluster-specific gene markers for differentiation of *Shigella***  
549 **and EIEC isolates**

550 Several studies have identified phylogenetic related genomic markers for discrimination of  
551 *Shigella* and EIEC and between *Shigella* species (23, 27, 28, 41, 55, 56). However, these  
552 phylogenetic analyses were performed only with a small number of genomes (23, 28, 55). In  
553 addition, non-invasive *E. coli* isolates were included in some of the phylogenetic clusters  
554 identified (28) which led to non-invasive *E. coli* isolates being identified by the markers.

555

556 We identified cluster-specific gene markers for each respectively clusters which were only  
557 composed of *Shigella* or EIEC isolates. Sets of cluster-specific gene markers were identified  
558 for those clusters where no single suitable marker is present. The combination of genes  
559 enhances the specificity of cluster-specific gene markers as demonstrated by the 100%  
560 sensitivity and very high specificity in this analysis (Table 2). Genes specific to each of the 53  
561 sporadic EIEC lineages were also identified and they were sensitive and specific, although it  
562 should be noted that these values are based on very small sample sizes.

563  
564 The cluster-specific gene markers or marker sets can be used to differentiate *Shigella*/EIEC  
565 from non-enteroinvasive *E. coli* independent of *ipaH* gene. The *ipaH* gene as a molecular  
566 target has been used to differentiate *Shigella* and EIEC from non-enteroinvasive *E. coli* (24,  
567 43-45). In our study, the cluster-specific gene markers were specific to *Shigella*/EIEC with  
568 98.8% to 100% specificity when evaluated on non-enteroinvasive *E. coli* control database,  
569 giving us the confidence that the cluster-specific genes or sets are robust markers to identify  
570 *Shigella*/EIEC. 53 sporadic EIEC lineage specific gene markers also have very high specificity  
571 (97.02% to 100%) against non-enteroinvasive *E. coli* control database.

572  
573 The cluster-specific gene markers or marker sets are able to assign *Shigella*/EIEC isolates  
574 correctly in 99.63% of cases and can clearly distinguish *Shigella* isolates from EIEC when  
575 applied to the validation dataset. While ShigaTyper assigned 46.95% isolates to *Shigella* and  
576 51.45% isolates to EIEC in the same dataset we tested, leading to a large proportion of isolates  
577 incorrectly assigned. The majority of the isolates predicted as EIEC by ShigaTyper were SS or  
578 SD1 as they belonged to SS and SD1 specific STs and were positive to a set of SS or SD1  
579 specific gene markers and grouped into SS or SD1 cluster on our phylogenetic tree. The genes  
580 used in ShigaTyper were SS specific marker Ss\_methylase gene (81, 82) together with SS O  
581 antigen wzx gene. However, SS specific marker Ss\_methylase gene was found in other  
582 *Shigella* serotypes and EIEC (10) and SS O antigen wzx gene were located on a plasmid which  
583 is frequently lost (83). Similarly, the SD1 O antigen genes used in ShigaTyper were plasmid-  
584 borne which may also lead to inconsistent detection (84, 85). A previous study identified 6 loci  
585 to distinguish EIEC from *Shigella* (23). We searched the 6 loci against our *Shigella*/EIEC  
586 database and found that some *Shigella* isolates were misidentified as EIEC isolates, such as  
587 SD8 isolates incorrectly identified as EIEC subtype 13. Our cluster-specific genes can  
588 differentiate SD8 isolates from EIEC with 100% accuracy. Therefore, the cluster-specific gene  
589 markers marker sets provided nearly perfect differentiation of *Shigella* from EIEC.

590  
591 The cluster-specific gene markers or marker sets are able to differentiate SS and SF (with  
592 exception of SF6) from SB and SD. SF and SS are the major cause of *Shigella* infections,  
593 accounting for up to 89.6% annual cases (11-13). Differentiation of SS and SF isolates from  
594 SB and SD is also beneficial for diagnosis and surveillance. A recent study identified “species”  
595 specific markers for the detection of each of the four *Shigella* “species” and validated with only  
596 one isolate per species (55). A molecular algorithm based on *Shigella* O antigen genes can  
597 detect 85% of SF isolates (52). In contrast, a set of SF specific genes in our study can correctly  
598 identify SF isolates with 99.62% accuracy.

599  
600 The cluster-specific gene markers or marker sets can also assign *Shigella*/EIEC isolates to  
601 serotype level if the cluster has single serotype such as SD1, SD8, SD10, SB13, SB12, EIEC  
602 O144:H25 (C7), EIEC O96:H19 (C8), EIEC O8:H19 (C9) and EIEC O135:H30 (C10). The  
603 remaining EIEC, SF, SB and SD serotypes were distributed over the major clusters C4-6, C3,  
604 C1 and C2 respectively. Cluster-specific gene markers combined with serotype associated O  
605 antigen and modification genes can further identify these isolates to serotype level.

606  
607 **Cluster-specific gene marker based ShigEiFinder can accurately type *Shigella* and EIEC**  
608 To facilitate the use of cluster-specific gene markers or marker sets for typing, we developed  
609 an automated pipeline, ShigEiFinder, for *in silico* molecular serotyping of *Shigella*/EIEC.  
610 ShigEiFinder provided *Shigella*/ EIEC differentiation as well as serotype prediction by yielding  
611 “presence or absence” of cluster-specific gene markers or marker sets combined with  
612 *Shigella*/EIEC O antigen genes and modification genes in a query isolate (either reads or  
613 assembled genomes). We showed 99.70% and 99.81% accuracy to assign isolates to the correct  
614 clusters from 15,501 *Shigella*/EIEC isolates in validation dataset for the assembled genomes  
615 and reads mapping respectively. In contrast, the existing *in silico* *Shigella* serotyping pipeline  
616 ShigaTyper had 46.95% accuracy for reads mapping when tested with the same validation  
617 dataset, with 51.45% of isolates in validation dataset being predicted as EIEC by ShigaTyper.

618  
619 The genetic determinants used in ShigaTyper for differentiation of *Shigella* from EIEC and  
620 identification of SS were *lacY*, *cadA*, *Ss\_methylase*, SS and SD1 O antigen *wzx* genes (10). As  
621 discussed above some of these genes were found to be non-specific in this study. Compared  
622 with ShigaTyper, the cluster-specific gene markers used in ShigEiFinder for identification of  
623 *Shigella* and EIEC provided higher discriminatory power than ShigaTyper. ShigEiFinder also

624 provided a high specificity with 99.40% for assembled genomes and 99.38% for reads  
625 mapping.

626  
627 ShigEiFinder can differentiate *Shigella* isolates from EIEC and distinguish SS and SF (with  
628 exception of SF6) isolates from SB and SD accurately. It also can identify SD1 isolates  
629 directly. ShigEiFinder was able to serotype over 59 *Shigella* serotypes and 22 EIEC serotypes.  
630 Therefore, ShigEiFinder will be useful for clinical, epidemiological and diagnostic  
631 investigations and the cluster-specific gene markers identified could be adapted for  
632 metagenomics or culture independent typing.

633  
634 **Conclusion**  
635 This study analysed over 17,000 publicly available *Shigella*/EIEC genomes and identified 10  
636 clusters of *Shigella*, 7 clusters of EIEC and 53 sporadic types of EIEC. Cluster-specific gene  
637 markers or marker sets for the 17 major clusters and 53 sporadic types were identified and  
638 found to be valuable for *in silico* typing. We additionally developed a freely available *in silico*  
639 serotyping pipeline incorporating the cluster-specific gene markers to facilitate serotyping of  
640 *Shigella*/EIEC isolates using genome sequences with very high specificity and sensitivity.

641  
642 **Funding information**  
643 This work was funded in part by a National Health and Medical Research Council project grant  
644 (grant number 1129713) and an Australian Research Council Discovery Grant (DP170101917).

645  
646 **Acknowledgements**  
647 The authors thank Duncan Smith and Robin Heron from UNSW Research Technology  
648 Services for computing assistance.

649  
650 **Author contributions**  
651 Conceptualization: R.L, M.P.; Investigation: X.Z., M.P., T.N., S.K.; Methodology: M.P., R.L.  
652 Writing – original draft: X.Z.; Writing – review and editing: M.P., R.L.

653  
654 **Conflicts of interest**  
655 The authors declare that there are no conflicts of interest.

656  
657 **Data bibliography**

658 Zhang X, Payne M, Nguyen T, Kaur S, Lan R. All the sequencing data generated within this  
659 study, NCBI BioProject number (PRJNA692536).

660

## 661 **Abbreviations**

662 SS, *Shigella sonnei*; SF, *Shigella flexneri*; SB, *Shigella boydii*; SD, *Shigella dysenteriae*; EIEC,  
663 Enteroinvasive *Escherichia coli*; NCBI SRA, National Center for Biotechnology Information  
664 Sequence Read Archive; ST, sequence type; rST, ribosomal ST; MLST, Multilocus sequence  
665 typing; rMLST, Ribosomal MLST; ECOR, *Escherichia coli* reference collection; WGS, whole-  
666 genome sequencing; TP, true positive; FN, false negative; FP, false positive; HK, House  
667 Keeping.

668

669

## 670 **References**

- 671 1. DuPont HL, Levine MM, Hornick RB, Formal SBJTJoid. Inoculum size in shigellosis  
672 and implications for expected mode of transmission. *The Journal of infectious diseases*.  
673 1989;159(6):1126-8.
- 674 2. Troeger C, Forouzanfar M, Rao PC, Khalil I, Brown A, Reiner Jr RC, et al. Estimates  
675 of global, regional, and national morbidity, mortality, and aetiologies of diarrhoeal diseases: a  
676 systematic analysis for the Global Burden of Disease Study 2015. *The Lancet Infectious*  
677 *Diseases*. 2017;17(9):909-48.
- 678 3. World Health Organization. Guidelines for the control of shigellosis, including  
679 epidemics due to *Shigella dysenteriae* type 1. 2005.
- 680 4. Kirk MD, Pires SM, Black RE, Caipo M, Crump JA, Devleeschauwer B, et al. World  
681 Health Organization estimates of the global and regional disease burden of 22 foodborne  
682 bacterial, protozoal, and viral diseases, 2010: a data synthesis. *PLoS medicine*.  
683 2015;12(12):e1001921.
- 684 5. Brengi SP, Sun Q, Bolaños H, Duarte F, Jenkins C, Pichel M, et al. PCR-based method  
685 for *Shigella flexneri* serotyping: international multicenter validation. *Journal of clinical*  
686 *microbiology*. 2019;57(4):e01592-18.
- 687 6. Kotloff KL, Nataro JP, Blackwelder WC, Nasrin D, Farag TH, Panchalingam S, et al.  
688 Burden and aetiology of diarrhoeal disease in infants and young children in developing  
689 countries (the Global Enteric Multicenter Study, GEMS): a prospective, case-control study.  
690 *The Lancet* 2013;382(9888):209-22.

- 691 7. Khalil IA, Troeger C, Blacker BF, Rao PC, Brown A, Atherly DE, et al. Morbidity and  
692 mortality due to *shigella* and enterotoxigenic *Escherichia coli* diarrhoea: the Global Burden of  
693 Disease Study 1990–2016. *The Lancet Infectious Diseases*. 2018;18(11):1229-40.
- 694 8. van den Beld MJ, Warmelink E, Friedrich AW, Reubsat FA, Schipper M, de Boer RF,  
695 et al. Incidence, clinical implications and impact on public health of infections with *Shigella*  
696 *spp.* and entero-invasive *Escherichia coli* (EIEC): results of a multicenter cross-sectional study  
697 in the Netherlands during 2016–2017. *BMC Infectious Diseases*. 2019;19(1):1037.
- 698 9. Edwards PR, Ewing WH. Identification of enterobacteriaceae. Identification of  
699 Enterobacteriaceae.. 1972(Third edition).
- 700 10. Wu Y, Lau HK, Lee T, Lau DK, Payne J. *In silico* serotyping based on Whole-Genome  
701 sequencing improves the accuracy of *shigella* identification. *Appl Environ Microbiol*.  
702 2019;85(7):e00165-19.
- 703 11. The HC, Thanh DP, Holt KE, Thomson NR, Baker SJNRM. The genomic signatures of  
704 *Shigella* evolution, adaptation and geographical spread. *Nature Reviews Microbiology*.  
705 2016;14(4):235.
- 706 12. Livio S, Strockbine NA, Panchalingam S, Tennant SM, Barry EM, Marohn ME, et al.  
707 *Shigella* isolates from the global enteric multicenter study inform vaccine development.  
708 *Clinical Infectious Diseases*. 2014;59(7):933-41.
- 709 13. Group OW. Monitoring the incidence and causes of diseases potentially transmitted by  
710 food in Australia: Annual report of the OzFoodNet network, 2011. *Communicable diseases*  
711 *intelligence quarterly report*. 2015;39(2):E236.
- 712 14. Connor TR, Barker CR, Baker KS, Weill F-X, Talukder KA, Smith AM, et al. Species-  
713 wide whole genome sequencing reveals historical global spread and recent local persistence in  
714 *Shigella flexneri*. *Elife*. 2015;4:e07335.
- 715 15. Taylor D, Echeverria P, Sethabutr O, Pitarangsi C, Leksomboon U, Blacklow N, et al.  
716 Clinical and microbiologic features of *Shigella* and enteroinvasive *Escherichia coli* infections  
717 detected by DNA hybridization. *Journal of clinical microbiology*. 1988;26(7):1362-6.
- 718 16. Levine MM. *Escherichia coli* that cause diarrhea: enterotoxigenic, enteropathogenic,  
719 enteroinvasive, enterohemorrhagic, and enteroadherent. *Journal of infectious Diseases*. 1987  
720 Mar 1;155(3):377-89.
- 721 17. Tai AY, Easton M, Encena J, Rotty J, Valcanis M, Howden BP, et al. A review of the  
722 public health management of shigellosis in Australia in the era of culture-independent  
723 diagnostic testing. *Australian New Zealand journal of public health*. 2016;40(6):588-91.

- 724 18. Gomes TA, Elias WP, Scaletsky IC, Guth BE, Rodrigues JF, Piazza RM, et al.  
725 Diarrheagenic *Escherichia coli*. *brazilian journal of microbiology* 2016;47:3-30.
- 726 19. Pasqua M, Michelacci V, Di Martino ML, Tozzoli R, Grossi M, Colonna B, et al. The  
727 Intriguing Evolutionary Journey of Enteroinvasive *E. coli* (EIEC) toward Pathogenicity.  
728 *Frontiers in microbiology*. 2017;8:2390.
- 729 20. Herzig CT, Fleischauer AT, Lackey B, Lee N, Lawson T, Moore ZS, et al. Notes from  
730 the Field: Enteroinvasive *Escherichia coli* Outbreak Associated with a Potluck Party—North  
731 Carolina, June–July 2018. *Morbidity and Mortality Weekly Report*. 2019;68(7):183.
- 732 21. Pettengill EA, Hoffmann M, Binet R, Roberts RJ, Payne J, Allard M, et al. Complete  
733 genome sequence of enteroinvasive *Escherichia coli* O96: H19 associated with a severe  
734 foodborne outbreak. *Genome Announcements*. 2015;3(4):e00883-15.
- 735 22. Escher M, Scavia G, Morabito S, Tozzoli R, Maugliani A, Cantoni S, et al. A severe  
736 foodborne outbreak of diarrhoea linked to a canteen in Italy caused by enteroinvasive  
737 *Escherichia coli*, an uncommon agent. *Epidemiology and infection*. 2014;142(12):2559-66.
- 738 23. Dhakal R, Wang Q, Lan R, Howard P, Sintchenko VJJomm. Novel multiplex PCR  
739 assay for identification and subtyping of enteroinvasive *Escherichia coli* and differentiation  
740 from *Shigella* based on target genes selected by comparative genomics. *Journal of medical  
741 microbiology*. 2018;67(9):1257-64.
- 742 24. Van den Beld M, Reubsat FJEjocm, diseases i. Differentiation between *Shigella*,  
743 enteroinvasive *Escherichia coli* (EIEC) and noninvasive *Escherichia coli*. *European Journal of  
744 Clinical Microbiology & Infectious Diseases*. 2012;31(6):899-904.
- 745 25. Pupo GM, Lan R, Reeves PRJPotNAoS. Multiple independent origins of *Shigella*  
746 clones of *Escherichia coli* and convergent evolution of many of their characteristics.  
747 *Proceedings of the National Academy of Sciences* 2000;97(19):10567-72.
- 748 26. Lan R, Alles MC, Donohoe K, Martinez MB, Reeves PRJI, immunity. Molecular  
749 evolutionary relationships of enteroinvasive *Escherichia coli* and *Shigella spp*. *Infection and  
750 immunity*. 2004;72(9):5080-8.
- 751 27. Sahl JW, Morris CR, Emberger J, Fraser CM, Ochieng JB, Juma J, et al. Defining the  
752 phylogenomics of *Shigella* species: a pathway to diagnostics. *Journal of clinical microbiology*.  
753 2015;53(3):951-60.
- 754 28. Pettengill EA, Pettengill JB, Binet RJFim. Phylogenetic analyses of *Shigella* and  
755 enteroinvasive *Escherichia coli* for the identification of molecular epidemiological markers:  
756 whole-genome comparative analysis does not support distinct genera designation. *Frontiers in  
757 microbiology*. 2016;6:1573.

- 758 29. Cheasty T, Rowe BJJocm. Antigenic relationships between the enteroinvasive  
759 *Escherichia coli* O antigens O28ac, O112ac, O124, O136, O143, O144, O152, and O164 and  
760 *Shigella* O antigens. *Journal of clinical microbiology*. 1983;17(4):681-4.
- 761 30. Landersjö C, Weintraub A, Widmalm GJCr. Structure determination of the O-antigen  
762 polysaccharide from the enteroinvasive *Escherichia coli* (EIEC) O143 by component analysis  
763 and NMR spectroscopy. *Carbohydrate research*. 1996;291:209-16.
- 764 31. Linnerborg M, Weintraub A, Widmalm GJEjob. Structural studies of the O-antigen  
765 polysaccharide from the enteroinvasive *Escherichia coli* O164 cross-reacting with *Shigella*  
766 *dysenteriae* type 3. *European journal of biochemistry*. 1999;266(2):460-6.
- 767 32. Sansonetti P, d'Hauteville H, Écobichon Ct, Pourcel C, editors. Molecular comparison  
768 of virulence plasmids in *Shigella* and enteroinvasive *Escherichia coli*. *Annales de l'Institut*  
769 *Pasteur/Microbiologie*; 1983: Elsevier.
- 770 33. Lan R, Lumb B, Ryan D, Reeves PRJI, immunity. Molecular Evolution of Large  
771 Virulence Plasmid in *Shigella* Clones and Enteroinvasive *Escherichia coli*. *Infection and*  
772 *immunity*. 2001;69(10):6303-9.
- 773 34. Venkatesan MM, Buysse JM, Kopecko DJJJoCM. Use of *Shigella flexneri* ipaC and  
774 ipaH gene sequences for the general identification of *Shigella spp.* and enteroinvasive  
775 *Escherichia coli*. *Journal of Clinical Microbiology*. 1989;27(12):2687-91.
- 776 35. Hale TLJM, Reviews MB. Genetic basis of virulence in *Shigella* species. *Microbiology*  
777 *Microbiology and Molecular Biology Reviews*. 1991;55(2):206-24.
- 778 36. Jin Q, Yuan Z, Xu J, Wang Y, Shen Y, Lu W, et al. Genome sequence of *Shigella*  
779 *flexneri* 2a: insights into pathogenicity through comparison with genomes of *Escherichia coli*  
780 K12 and O157. *Nucleic acids research*. 2002;30(20):4432-41.
- 781 37. Yang F, Yang J, Zhang X, Chen L, Jiang Y, Yan Y, et al. Genome dynamics and  
782 diversity of *Shigella* species, the etiologic agents of bacillary dysentery. *Nucleic acids*  
783 *research*. 2005;33(19):6445-58.
- 784 38. Yang J, Nie H, Chen L, Zhang X, Yang F, Xu X, et al. Revisiting the molecular  
785 evolutionary history of *Shigella spp.* *Journal of molecular evolution*. 2007;64(1):71-9.
- 786 39. Hyma KE, Lacher DW, Nelson AM, Bumbaugh AC, Janda JM, Strockbine NA, et al.  
787 Evolutionary genetics of a new pathogenic *Escherichia* species: *Escherichia albertii* and  
788 related *Shigella boydii* strains. *Journal of bacteriology*. 2005;187(2):619-28.
- 789 40. Walters LL, Raterman EL, Grys TE, Welch RA. Atypical *Shigella boydii* 13 encodes  
790 virulence factors seen in attaching and effacing *Escherichia coli*. *FEMS Microbiol Lett*.  
791 2012;328(1):20-5.



- 792 41. Hazen TH, Leonard SR, Lampel KA, Lacher DW, Maurelli AT, Rasko DAJI, et al.  
793 Investigating the relatedness of enteroinvasive *Escherichia coli* to other *E. coli* and *Shigella*  
794 isolates by using comparative genomics. *Infection and immunity*. 2016;84(8):2362-71.
- 795 42. Silva RM, Toledo M, Trabulsi LRJJoCM. Biochemical and cultural characteristics of  
796 invasive *Escherichia coli*. *Journal of Clinical Microbiology*. 1980;11(5):441-4.
- 797 43. van den Beld MJ, Friedrich AW, van Zanten E, Reubsæet FA, Kooistra-Smid MA,  
798 Rossen JWJ Jomm. Multicenter evaluation of molecular and culture-dependent diagnostics for  
799 *Shigella* species and Enteroinvasive *Escherichia coli* in the Netherlands. *Journal of*  
800 *microbiological methods*. 2016;131:10-5.
- 801 44. Van Lint P, De Witte E, Ursi J, Van Herendael B, Van Schaeren JJDm, disease i. A  
802 screening algorithm for diagnosing bacterial gastroenteritis by real-time PCR in combination  
803 with guided culture. *Diagnostic microbiology*. 2016;85(2):255-9.
- 804 45. De Boer RF, Ott A, Kesztyüs B, Kooistra-Smid AMJJocm. Improved detection of five  
805 major gastrointestinal pathogens by use of a molecular screening approach. *Journal of clinical*  
806 *microbiology*. 2010;48(11):4140-6.
- 807 46. Liu B, Knirel YA, Feng L, Perepelov AV, Senchenkova SyN, Wang Q, et al. Structure  
808 and genetics of *Shigella* O antigens. *FEMS microbiology reviews*. 2008;32(4):627-53.
- 809 47. Wattiau P, Boland C, Bertrand S. Methodologies for *Salmonella enterica ssp enterica*  
810 subtyping: gold standards and alternatives. *Applied and environmental microbiology*.  
811 2011:AEM. 05527-11.
- 812 48. Cai H, Lu L, Muckle C, Prescott J, Chen S. Development of a novel protein microarray  
813 method for serotyping *Salmonella enterica* strains. *Journal of clinical microbiology*.  
814 2005;43(7):3427-30.
- 815 49. van der Ploeg CA, Rogé AD, Bordagorria XL, de Urquiza MT, Castillo ABC, Bruno  
816 SB. Design of Two Multiplex PCR Assays for Serotyping *Shigella flexneri*. *Foodborne*  
817 *pathogens and disease*. 2018;15(1):33-8.
- 818 50. Sun Q, Lan R, Wang Y, Zhao A, Zhang S, Wang J, et al. Development of a multiplex  
819 PCR assay targeting O-antigen modification genes for molecular serotyping of *Shigella*  
820 *flexneri*. *Journal of clinical microbiology*. 2011;49(11):3766-70.
- 821 51. Li Y, Cao B, Liu B, Liu D, Gao Q, Peng X, et al. Molecular detection of all 34 distinct  
822 O-antigen forms of *Shigella*. *J Med Microbiol*. 2009;58(Pt 1):69-81.
- 823 52. van den Beld MJ, de Boer RF, Reubsæet FA, Rossen JW, Zhou K, Kuiling S, et al.  
824 Evaluation of a Culture-Dependent Algorithm and a Molecular Algorithm for Identification of

- 825 *Shigella spp.*, *Escherichia coli*, and Enteroinvasive *E. coli*. *Journal of clinical microbiology*.  
826 2018;56(10):e00510-18.
- 827 53. Pavlovic M, Luze A, Konrad R, Berger A, Sing A, Busch U, et al. Development of a  
828 duplex real-time PCR for differentiation between *E. coli* and *Shigella spp.* *Journal of applied*  
829 *microbiology*. 2011;110(5):1245-51.
- 830 54. Løbersli I, Wester AL, Kristiansen Å, Brandal LTJEJoM, Immunology. Molecular  
831 differentiation of *Shigella spp.* from enteroinvasive *E. coli*. *European Journal of Microbiology*.  
832 2016;6(3):197-205.
- 833 55. Kim H-J, Ryu J-O, Song J-Y, Kim H-YJFp, disease. Multiplex polymerase chain  
834 reaction for identification of shigellae and four *Shigella* species using novel genetic markers  
835 screened by comparative genomics. *Foodborne pathogens*. 2017;14(7):400-6.
- 836 56. Chattaway MA, Schaefer U, Tewolde R, Dallman TJ, Jenkins CJJocm. Identification of  
837 *Escherichia coli* and *Shigella* species from whole-genome sequences. *Journal of clinical*  
838 *microbiology*. 2017;55(2):616-23.
- 839 57. Patro R, Duggal G, Love MI, Irizarry RA, Kingsford C. Salmon provides fast and bias-  
840 aware quantification of transcript expression. *Nature Methods*. 2017;14(4):417-9.
- 841 58. Wood DE, Salzberg SLJGb. Kraken: ultrafast metagenomic sequence classification  
842 using exact alignments. *Genome biology*. 2014;15(3):R46.
- 843 59. Alikhan N-F, Zhou Z, Sergeant MJ, Achtman M. A genomic overview of the  
844 population structure of *Salmonella*. *PLoS genetics*. 2018;14(4):e1007261.
- 845 60. Bankevich A, Nurk S, Antipov D, Gurevich AA, Dvorkin M, Kulikov AS, et al.  
846 SPAdes: a new genome assembly algorithm and its applications to single-cell sequencing.  
847 *Journal of computational biology*. 2012;19(5):455-77.
- 848 61. Gurevich A, Saveliev V, Vyahhi N, Tesler G. QUAST: quality assessment tool for  
849 genome assemblies. *Bioinformatics*. 2013;29(8):1072-5.
- 850 62. Jolley KA, Maiden MCJ. BIGSdb: Scalable analysis of bacterial genome variation at  
851 the population level. *BMC Bioinformatics*. 2010;11(1):595.
- 852 63. Joensen KG, Tetzschner AM, Iguchi A, Aarestrup FM, Scheutz FJJocm. Rapid and  
853 easy *in silico* serotyping of *Escherichia coli* isolates by use of whole-genome sequencing data.  
854 *Journal of clinical microbiology*. 2015;53(8):2410-26.
- 855 64. Hu D, Liu B, Wang L, Reeves PR. Living Trees: High-Quality Reproducible and  
856 Reusable Construction of Bacterial Phylogenetic Trees. *Molecular Biology and Evolution*.  
857 2019;37(2):563-75.

- 858 65. Letunic I, Bork PJ. Interactive Tree Of Life (iTOL) v4: recent updates and new  
859 developments. *Nucleic acids research*. 2019;47(W1):W256-W9.
- 860 66. Zhou Z, Alikhan N-F, Sergeant MJ, Luhmann N, Vaz C, Francisco AP, et al.  
861 GrapeTree: visualization of core genomic relationships among 100,000 bacterial pathogens.  
862 *Genome research*. 2018;28(9):1395-404.
- 863 67. Li H. Japa. Aligning sequence reads, clone sequences and assembly contigs with BWA-  
864 MEM. *arXiv preprint arXiv*. 2013.
- 865 68. Buchrieser C, Glaser P, Rusniok C, Nedjari H, d'Hauteville H, Kunst F, et al. The  
866 virulence plasmid pWR100 and the repertoire of proteins secreted by the type III secretion  
867 apparatus of *Shigella flexneri*. *Molecular microbiology*. 2000;38(4):760-71.
- 868 69. Li H, Handsaker B, Wysoker A, Fennell T, Ruan J, Homer N, et al. The Sequence  
869 Alignment/Map format and SAMtools. *Bioinformatics* 2009;25(16):2078-9.
- 870 70. Quinlan AR, Hall IM. BEDTools: a flexible suite of utilities for comparing genomic  
871 features. *Bioinformatics*. 2010;26(6):841-2.
- 872 71. Seemann T. Prokka: rapid prokaryotic genome annotation. *Bioinformatics*.  
873 2014;30(14):2068-9.
- 874 72. Page AJ, Cummins CA, Hunt M, Wong VK, Reuter S, Holden MT, et al. Roary: rapid  
875 large-scale prokaryote pan genome analysis. *Bioinformatics*. 2015;31(22):3691-3.
- 876 73. Camacho C, Coulouris G, Avagyan V, Ma N, Papadopoulos J, Bealer K, et al.  
877 BLAST+: architecture and applications. *BMC bioinformatics*. 2009;10(1):421.
- 878 74. Aziz RK, Bartels D, Best AA, DeJongh M, Disz T, Edwards RA, et al. The RAST  
879 Server: rapid annotations using subsystems technology. *BMC genomics*. 2008;9(1):75.
- 880 75. Sof'ya NS, Feng L, Yang J, Shashkov AS, Cheng J, Liu D, et al. Structural and genetic  
881 characterization of the *Shigella boydii* type 10 and type 6 O antigens. *Journal of bacteriology*.  
882 2005;187(7):2551-4.
- 883 76. Ansaruzzaman M, Kibriya A, Rahman A, Neogi P, Faruque A, Rowe B, et al. Detection  
884 of provisional serovars of *Shigella dysenteriae* and designation as *S. dysenteriae* serotypes 14  
885 and 15. *Journal of clinical microbiology*. 1995;33(5):1423-5.
- 886 77. Balows AJDM, Disease I. Manual of clinical microbiology 8th edition: PR Murray, EJ  
887 Baron, JH Jorgenson, MA Pfaller, and RH Tenover, eds., ASM Press, 2003, 2113 pages, 2 vol,  
888 2003+ subject & author indices, ISBN: 1-555810255-4, US \$189.95. *Diagnostic Microbiology*.  
889 2003;47(4):625.

- 890 78. Woodward DL, Clark CG, Caldeira RA, Ahmed R, Soule G, Bryden L, et al.  
891 Identification and characterization of *Shigella boydii* 20 serovar nov., a new and emerging  
892 *Shigella* serotype. *J Med Microbiol.* 2005;54(8):741-8.
- 893 79. Kim J, Lindsey RL, Garcia-Toledo L, Loparev VN, Rowe LA, Batra D, et al. High-  
894 quality whole-genome sequences for 59 historical *Shigella* strains generated with PacBio  
895 sequencing. *Genome Announcements.* 2018;6(15).
- 896 80. Michelacci V, Prosseda G, Maugliani A, Tozzoli R, Sanchez S, Herrera-León S, et al.  
897 Characterization of an emergent clone of enteroinvasive *Escherichia coli* circulating in Europe.  
898 *Clinical Microbiology.* 2016;22(3):287. e11-. e19.
- 899 81. Liu J, Platts-Mills JA, Juma J, Kabir F, Nkeze J, Okoi C, et al. Use of quantitative  
900 molecular diagnostic methods to identify causes of diarrhoea in children: a reanalysis of the  
901 GEMS case-control study. *The Lancet.* 2016;388(10051):1291-301.
- 902 82. Cho MS, Ahn T-Y, Joh K, Kwon O-S, Jheong W-H, Park DSJMB. A novel marker for  
903 the species-specific detection and quantitation of *Shigella sonnei* by targeting a methylase  
904 gene. *J Microbiol Biotechnol.* 2012;22(8):1113-7.
- 905 83. Sansonetti PJ, Kopecko DJ, Formal SBJI, immunity. *Shigella sonnei* plasmids:  
906 evidence that a large plasmid is necessary for virulence. *Infection and immunity.*  
907 1981;34(1):75-83.
- 908 84. Feng L, Perepelov AV, Zhao G, Shevelev SD, Wang Q, Sof'ya NS, et al. Structural and  
909 genetic evidence that the *Escherichia coli* O148 O antigen is the precursor of the *Shigella*  
910 *dysenteriae* type 1 O antigen and identification of a glucosyltransferase gene. *Microbiology.*  
911 2007;153(1):139-47.
- 912 85. Göhmann S, Manning P, Alpert C-A, Walker M, Timmis KJMp. Lipopolysaccharide  
913 O-antigen biosynthesis in *Shigella dysenteriae* serotype 1: analysis of the plasmid-carried rfp  
914 determinant. *Microbial pathogenesis.* 1994;16(1):53-64.

915

916

917 **Table 1: The summary of identified *Shigella*/EIEC clusters and outliers in identification dataset**

| Clusters (no of serotypes) <sup>#</sup> | No of isolates | No. STs | No. rSTs | Serotypes                                                                                                                                                         |
|-----------------------------------------|----------------|---------|----------|-------------------------------------------------------------------------------------------------------------------------------------------------------------------|
| C1 (25)                                 | 288            | 36      | 166      | SB1-4, SB6, SB8, SB10, SB14, SB18, SB11 <sup>b</sup> , SB19-20 <sup>b</sup> ; SD3-7, SD9, SD11-13, SD14-15 <sup>*</sup> , SD-96-265 <sup>*</sup> ; SF6            |
| C2 (9)                                  | 101            | 19      | 56       | SB5, SB7, SB9, SB11, SB15, SB16, SB17; SD2, SD-E670-74 <sup>b</sup> ; SD2                                                                                         |
| C3 (20)                                 | 744            | 81      | 437      | SF1a, SF1b, SF1c (7a), SF2a, SF2b, SF3a, SF3b, SF4a, SF4av, SF4b, SF4bv, SF5a, SF5b, SF7b, SFX, SFXv (4c), SFY, SFYv, SF novel serotype; SB-E1621-54 <sup>*</sup> |
| C4 (9)                                  | 51             | 6       | 21       | O28ac:H-, O28ac:H7, O136:H7, O164:H-, O164:H7, O29:H4, O173:H7, O124:H7, O132:H7 <sup>*</sup>                                                                     |
| C5 (6)                                  | 62             | 4       | 15       | O121:H30, O124:H30, O164:H30, O132:H21, O152:H30, O152:H-                                                                                                         |
| C6 (3)                                  | 20             | 2       | 6        | O143:H26, O167:H26, O112ac:H26 <sup>b</sup>                                                                                                                       |
| C7                                      | 10             | 1       | 3        | O144:H25                                                                                                                                                          |
| C8 <sup>a</sup>                         | 12             | 2       | 1        | O96:H19                                                                                                                                                           |
| C9 <sup>a</sup>                         | 4              | 1       | 2        | O8:H19                                                                                                                                                            |
| C10 <sup>#</sup>                        | 2              | 1       | 1        | O135:H30                                                                                                                                                          |
| CSS                                     | 427            | 39      | 294      |                                                                                                                                                                   |
| CSD1                                    | 70             | 8       | 56       | SD1                                                                                                                                                               |
| CSD8                                    | 7              | 3       | 3        | SD8                                                                                                                                                               |
| CSD10                                   | 2              | 2       | 1        | SD10                                                                                                                                                              |
| CSB12 <sup>a</sup>                      | 8              | 2       | 6        | SB12                                                                                                                                                              |
| CSB13                                   | 7              | 3       | 3        | SB13                                                                                                                                                              |

| <b>Clusters (no of serotypes)<sup>#</sup></b> | <b>No of isolates</b> | <b>No. STs</b> | <b>No. rSTs</b> | <b>Serotypes</b> |
|-----------------------------------------------|-----------------------|----------------|-----------------|------------------|
| CSB13-atypical <sup>a</sup>                   | 5                     | 3              | 3               | SB13             |
| Sporadic EIEC lineages <sup>a</sup> (53)      | 59                    | 49             | 53              | 53 antigen types |

918

919 <sup>#</sup>Numbers in parentheses are the number of serotypes within that cluster.

920 <sup>a</sup>: Clusters identified as new clusters in this study.

921 <sup>b</sup>: Serotypes were inconsistent with previous analyses.

922

923

924 **Table 2: The sensitivity and specificity of cluster-specific genes**

| Clusters                  | Cluster-specific genes (Single/sets) <sup>b</sup> | Identification dataset (1969 isolates) |             |                    |
|---------------------------|---------------------------------------------------|----------------------------------------|-------------|--------------------|
|                           |                                                   | No of isolates                         | Sensitivity | Specificity        |
| C1                        | Set of 4 genes                                    | 288                                    | 100         | 99.94 <sup>a</sup> |
| C2                        | Set of 3 genes                                    | 101                                    | 100         | 100                |
| C3                        | Set of 3 genes                                    | 744                                    | 100         | 99.59 <sup>a</sup> |
| C4                        | Set of 2 genes                                    | 51                                     | 100         | 100                |
| C5                        | Set of 3 genes                                    | 62                                     | 100         | 100                |
| C6                        | Set of 2 genes                                    | 20                                     | 100         | 100                |
| C7                        | Single gene                                       | 10                                     | 100         | 100                |
| C8                        | Set of 2 genes                                    | 12                                     | 100         | 100                |
| C9                        | Set of 2 genes                                    | 4                                      | 100         | 100                |
| C10                       | Single gene                                       | 2                                      | 100         | 100                |
| CSS                       | Set of 5 genes                                    | 427                                    | 100         | 99.87 <sup>a</sup> |
| CSD1                      | Set of 2 genes                                    | 70                                     | 100         | 100                |
| CSD8                      | Single gene                                       | 7                                      | 100         | 100                |
| CSD10                     | Single gene                                       | 2                                      | 100         | 100                |
| CSB12                     | Single gene                                       | 8                                      | 100         | 100                |
| CSB13                     | Single gene                                       | 7                                      | 100         | 100                |
| CSB13-atypical            | Single gene                                       | 5                                      | 100         | 100                |
| 53 Sporadic EIEC lineages | Single gene / lineage                             | 59                                     | 100         | 100                |

925

926 <sup>a</sup>:The specificity of cluster-specific gene set less than 100% was due to at least one FP found in  
927 that set.

928 <sup>b</sup>: The sequences of these genes were listed in Data S1.

929

930 **Table 3: The accuracy of ShigEiFinder with identification dataset and validation dataset**

| 931 | ShigEiFinder assignments                | Identification Dataset (n=1,969) <sup>a</sup> |               | Validation dataset (n=15,501) |               |
|-----|-----------------------------------------|-----------------------------------------------|---------------|-------------------------------|---------------|
| 932 |                                         | Genomes                                       | Reads mapping | Genomes                       | Reads mapping |
| 933 | <i>Shigella</i> /EIEC clusters          | 1871                                          | 1848          | 15,455                        | 15,471        |
| 934 | Multiple <i>Shigella</i> /EIEC clusters | 9                                             | 6             | 33                            | 7             |
| 935 | <i>Shigella</i> /EIEC unclustered       | 0                                             | 8             | 13                            | 23            |
| 936 | Not <i>Shigella</i> /EIEC               | 89                                            | 89            | 0                             | 0             |
| 937 | Accuracy <sup>b</sup>                   | 99.54%                                        | 99.28%        | 99.70%                        | 99.81%        |

938

939 <sup>a</sup>: Identification dataset has 90 non-*Shigella*/EIEC strains including 72 ECOR strains and 18 *E.albertii* strains. 1,969 assembled genomes and  
 940 1,951 reads (reads not available for 18 EIEC isolates downloaded from NCBI) in identification dataset. One of *E.albertii* strain was assigned as  
 941 SB13 which was grouped into SB13 cluster on the phylogenetic tree.

942

943 <sup>b</sup>: The accuracy was defined as the number of *Shigella*/EIEC isolates being correctly assigned to cluster over the total number of tested.

944

945

946

947

948

949

950

951



952

953 **Table 4: Discrepant assignment of 8,224 isolates by ShigEiFinder and ShigaTyper**

| 954 | ShigEiFinder Assignment           | ShigaTyper assignment |              |                | Total |
|-----|-----------------------------------|-----------------------|--------------|----------------|-------|
| 955 |                                   | EIEC                  | Multiple wzx | Non-prediction |       |
| 956 | SS                                | 7,465                 | 12           | 7              | 7,484 |
| 957 | SF                                | 117                   | 61           | 10             | 188   |
| 958 | C1 and C2 (SB/SD)                 | 17                    | 99           | 51             | 167   |
| 959 | SB12                              | 0                     | 2            | 0              | 2     |
| 960 | SD1                               | 244                   | 1            | 1              | 246   |
| 961 | SD8                               | 1                     | 0            | 0              | 1     |
| 962 | SD10                              | 0                     | 0            | 2              | 2     |
| 963 | EIEC                              | 97                    | 0            | 0              | 97    |
| 964 | Sporadic EIEC lineages            | 15                    | 0            | 0              | 15    |
| 965 | Multiple clusters                 | 5                     | 2            | 0              | 7     |
| 966 | <i>Shigella</i> /EIEC unclustered | 15                    | 0            | 0              | 15    |
| 967 | Total                             | 7,976                 | 177          | 71             | 8,224 |

968

969 **Figure legends:**

970 **Figure 1: *Shigella*/EIEC cluster Identification phylogenetic tree**

971 Representative isolates from the identification dataset were used to construct the phylogenetic  
972 tree by Quicktree v1.3 (64) to identify *Shigella* and EIEC clusters and visualised by  
973 Grapetree's interactive mode. The dendrogram tree shows the phylogenetic relationships of  
974 1879 *Shigella* and EIEC isolates represented in the identification dataset. Branch lengths are  
975 log scale for clarity. The tree scales indicated the 0.2 substitutions per locus. *Shigella* and EIEC  
976 clusters are coloured. Numbers in square brackets indicate the number of isolates of each  
977 identified cluster. CSP is sporadic EIEC lineages.

978

979 **Figure 2: *in silico* serotyping pipeline workflow**

980 Schematic of *in silico* serotyping *Shigella* and EIEC by cluster-specific genes combined with  
981 the *ipaH* gene and O antigen and modification genes and H antigen genes, implemented in  
982 ShigEiFinder. Both assembled genomes and raw reads are accepted as data input.

983

984 **Supplementary Material**

985 **Figure S1: Identification phylogenetic tree**

986 An identification phylogenetic tree constructed by Quicktree v1.3 (64) and visualised by ITOL  
987 v5 shows the phylogenetic relationships of 1879 *Shigella* and EIEC isolates in identification  
988 dataset. The tree scales indicated the 0.01 substitutions per locus. *Shigella* and EIEC clusters  
989 are colored. The internal branches are colored to represent the bootstrap values. Green color  
990 indicates the maximum bootstrap value (1). The red color shows the minimum bootstrap value  
991 (0). Each of cluster is well supported by bootstrap value. CSP is sporadic EIEC lineages.

992

993 **Figure S2-A: Confirmation phylogenetic tree**

994 A confirmation phylogenetic tree was constructed by Quicktree v1.3 (64) based on 2375  
995 isolates and visualised by Grapetree's interactive mode. The tree shows the phylogenetic  
996 relationships between identified *Shigella*/EIEC clusters in identification dataset and non-  
997 enteroinvasive *E. coli* isolates. Branch lengths are log scale for clarity. The tree scales  
998 indicated the 0.1 substitutions per locus. Known *Shigella* and EIEC clusters from identification  
999 dataset are colored. Numbers in square brackets indicate the number of isolates of each  
1000 identified cluster. CSP is sporadic EIEC lineages.

1001

1002 **Figure S2-B: Confirmation phylogenetic tree**

1003 A confirmation phylogenetic tree constructed by Quicktree v1.3 (64) and visualised by ITOL  
1004 v5 shows the phylogenetic relationships between identified *Shigella*/EIEC clusters in  
1005 identification dataset and non-enteroinvasive *E. coli* isolates. The tree scales indicated the 0.01  
1006 substitutions per locus. *Shigella* and EIEC clusters are colored. The internal branches are  
1007 colored to represent the bootstrap values. Green color indicates the maximum bootstrap value  
1008 (1). The red color shows the minimum bootstrap value (0). Each of cluster is well supported by  
1009 bootstrap value. CSP is sporadic EIEC lineages.

1010

1011 **Figure S3: Distribution of mapped 38 virulence genes in 58 sporadic isolates**

1012 The presence of *Shigella* virulence plasmid pINV in 58 sporadic isolates in identification  
1013 dataset was determined by the mapped 38 virulence genes. Detailed genes were described in  
1014 Results "**Investigation of *Shigella* virulence plasmid pINV in 58 sporadic isolates**". Three  
1015 categories were defined based on the number of virulence genes mapped to isolate. Virulence  
1016 plasmid positive: > 25 genes mapped to isolate; Intermediate: 13 to 25 genes mapped to isolate;  
1017 Virulence plasmid negative: less than 13 genes mapped to isolate.

1018

1019 **Figure S4 (A): Validation phylogenetic tree**

1020 A validation tree was generated by Quicktree v1.3 (64) and visualised by Grapetree's  
1021 interactive mode to assign representative isolates in validation dataset to clusters. Branch  
1022 lengths are log scale for clarity. The tree scales indicated the 0.2 substitutions per locus.  
1023 Known *Shigella* and EIEC clusters from identification dataset are colored. Numbers in square  
1024 brackets indicate the number of isolates of each identified cluster. Isolates in validation dataset  
1025 are colored white. The isolates are assigned to clusters if they grouped into known cluster  
1026 isolates. CSP is sporadic EIEC lineages.

1027

1028 **Figure S4 (B): Validation phylogenetic tree**

1029 A validation phylogenetic tree was constructed by Quicktree v1.3 (64) and visualised by ITOL  
1030 v5 to assign representative isolates in validation dataset to clusters. The tree scales indicated  
1031 the 0.01 substitutions per locus. *Shigella* and EIEC clusters are colored. The internal branches  
1032 are colored to represent the bootstrap values. Green color indicates the maximum bootstrap  
1033 value (1). The red color shows the minimum bootstrap value (0). Each of cluster is well  
1034 supported by bootstrap value. Isolates that grouped with known cluster isolates (from  
1035 identification dataset) with strong bootstrap support are categorised into that cluster. CSP is  
1036 sporadic EIEC lineages.

1037

1038 **Table S1:** 1,969 isolates used in identification dataset

1039 **Table S2:** 15,501 isolates used in validation dataset

1040 **Table S3:** The location and function of cluster-specific genes

1041 **Table S4:** The results of cluster-specific gene markers tested with 12,743 non-enteroinvasive  
1042 *E. coli* isolates

1043

1044 **Data S1:** Algorithms incorporated into the ShigEiFinder

1045 **Data S2:** Genetic signature O and H genes from ShigaTyper and SerotypeFinder

1046

1047 **Data Availability Statement**

1048

1049 Custom python scripts used in this study are available from the authors on request.

1050

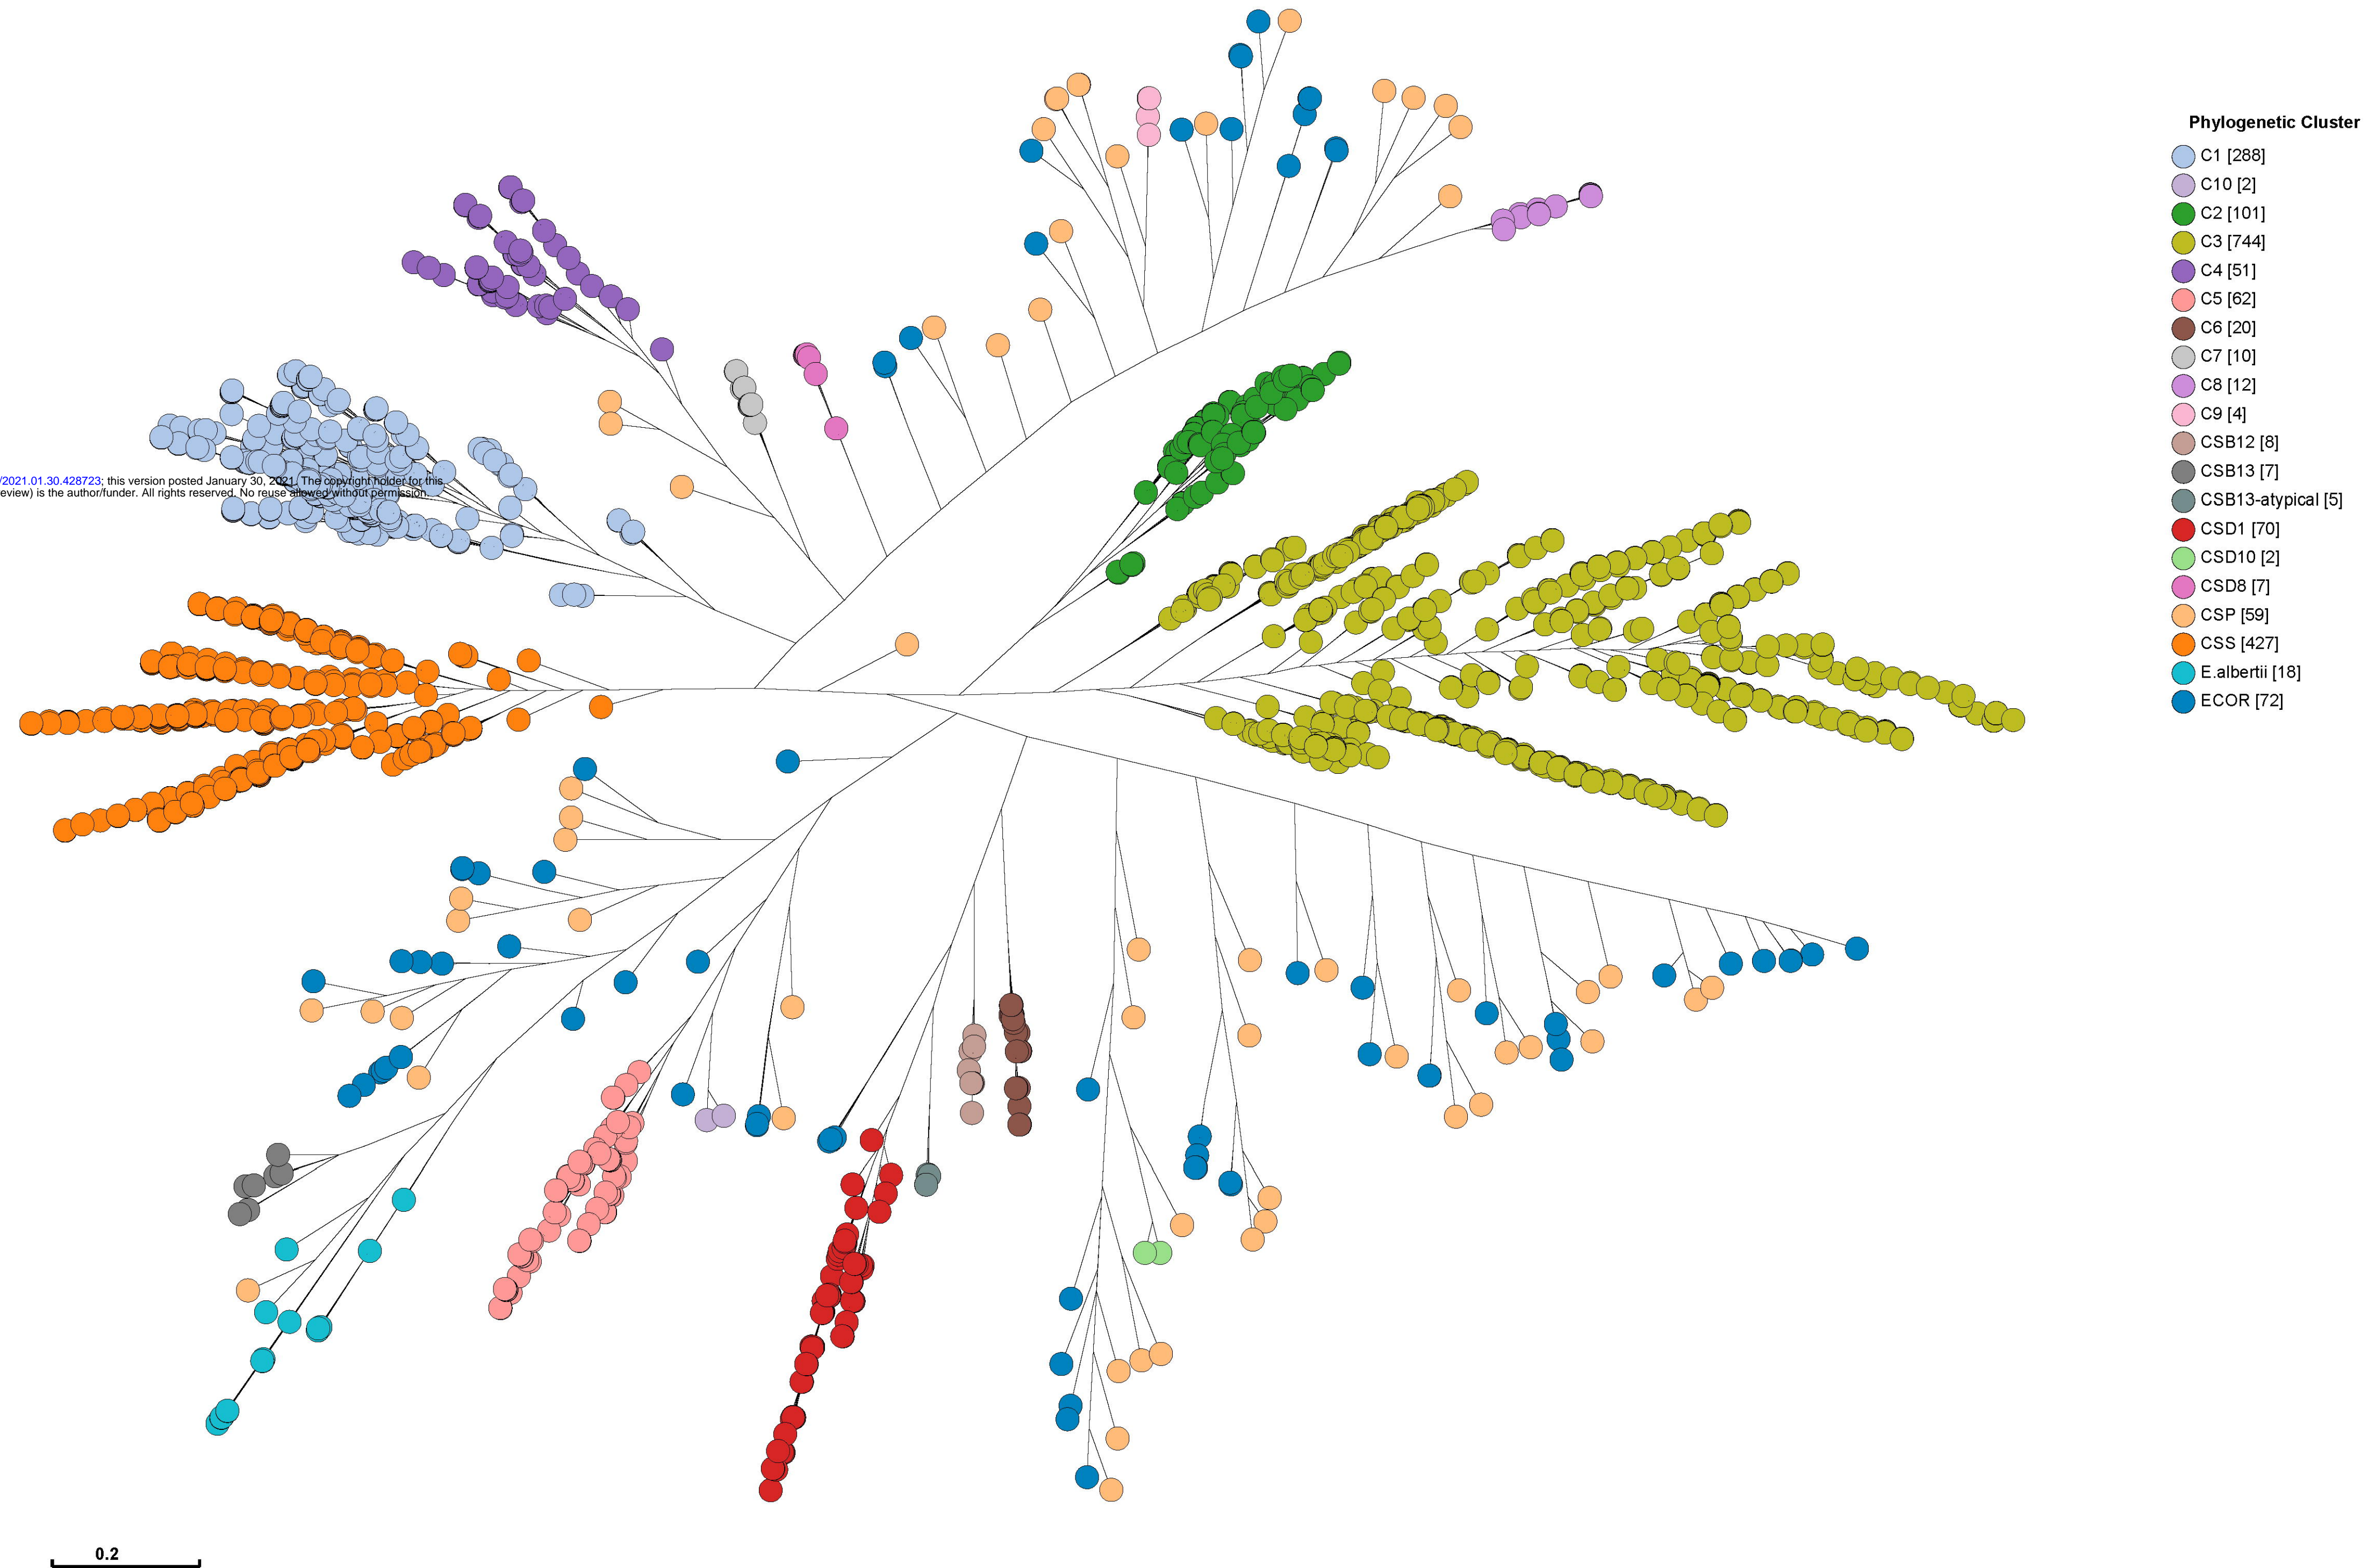

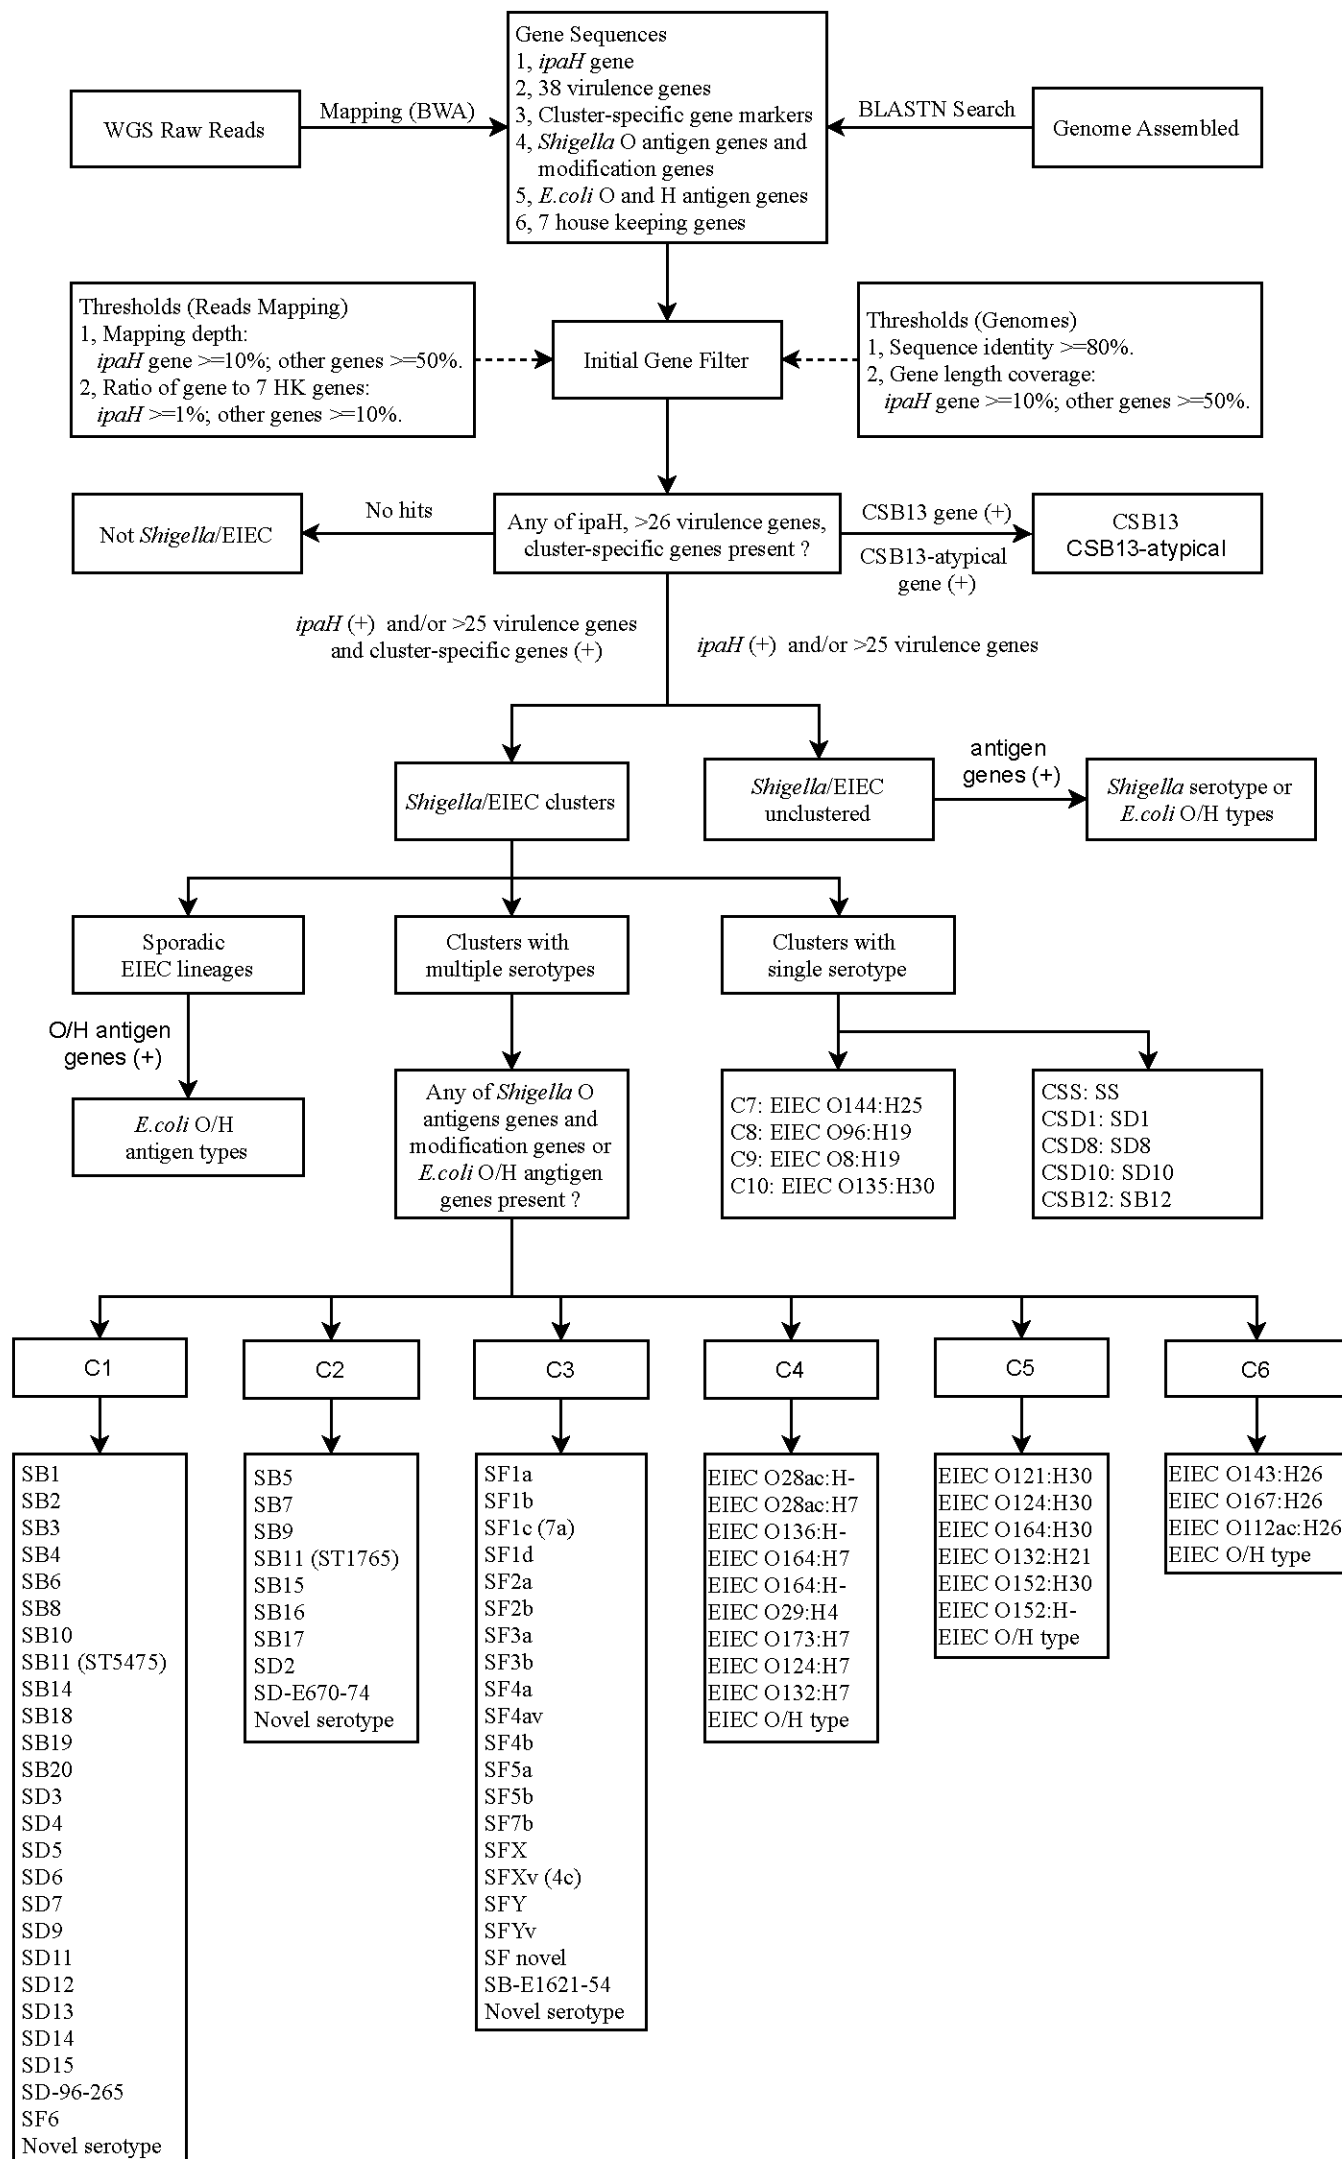

Source: https://www.biorxiv.org/content/biorxiv/early/2021/01/30/2021.01.30.428723.full.pdf
